16 **Abstract**

17 Transposable elements (TEs) make up a majority of a typical eukaryote's genome,  
18 and contribute to cell heterogeneity and fate in unclear ways. Single cell-sequencing  
19 technologies are powerful tools to explore cells, however analysis is typically gene-  
20 centric and TE activity has not been addressed. Here, we developed a single-cell TE  
21 processing pipeline, scTE, and report the activity of TEs in single cells in a range of  
22 biological contexts. Specific TE types were expressed in subpopulations of embryonic  
23 stem cells and were dynamically regulated during pluripotency reprogramming,  
24 differentiation, and embryogenesis. Unexpectedly, TEs were expressed in somatic  
25 cells, including human disease-specific TEs that are undetectable in bulk analyses.  
26 Finally, we applied scTE to single cell ATAC-seq data, and demonstrate that scTE can  
27 discriminate cell type using chromatin accessibility of TEs alone. Overall, our results  
28 reveal the dynamic patterns of TEs in single cells and their contributions to cell fate  
29 and heterogeneity.

30

31 **Keywords:** single cell RNA-seq; transposable element; gene expression.

## 32 **Introduction**

33 Transposable elements (TEs) are a heterogeneous collection of genomic elements  
34 that have at various stages invaded and replicated extensively in eukaryotic genomes.  
35 The vast majority of TEs are fossils, and can no longer duplicate themselves, but they  
36 remain inside the genome and in mammals occupy nearly half the total DNA<sup>1</sup>.  
37 Intriguingly, it is becoming clear that both the active and remnant TEs are participating  
38 in evolutionary innovation and in biological processes<sup>2-5</sup>, such as embryonic  
39 development<sup>6-9</sup>, and in human disease and cancer<sup>10,11</sup>. Additionally, TEs carry cis-  
40 regulatory sequences and their duplication and insertion can reshape gene regulatory  
41 networks by redistributing transcription factor (TF) binding sites and evolving new  
42 enhancer activities<sup>12-14</sup>. TEs transcription also has a key influence upon the  
43 transcriptional output of the mammalian genome<sup>15</sup>. However, the role of TEs in cell  
44 type heterogeneity and biological processes has only recently begun to be explored  
45 in depth.

46 Single cell RNA-seq (scRNA-seq) has developed as a powerful tool to observe  
47 cell activity<sup>16-18</sup>. Many new techniques have been developed to recover or reconstruct  
48 missing observations, such as spatial, temporal, and cell lineage information. However,  
49 an important source of genomic information has so far been overlooked in single cell  
50 studies: the effect of TEs. Despite their importance, we lack quantitative understanding  
51 of how those genomic elements are involved in cell fate regulation at the single cell  
52 level. As TEs pose unique challenges in quantification, due to their degeneracy and  
53 multiple genomic copies, a prerequisite to understand TEs at the single cell level is a  
54 tool to quantify the hundreds to millions of copies of repetitive elements within the

55 genome. To this end, we developed scTE, an algorithm that quantifies TE expression  
56 in single-cell sequence data.

57 We firstly demonstrate scTE's capabilities through an analysis of mouse  
58 embryonic stem cells (mESCs), which is one of the best characterized models for TE  
59 expression, as the expression of the endogenous retrovirus (ERV) MERVL marks a  
60 small population of cells in embryonic stem cell (ESC) cultures that are totipotent<sup>19,20</sup>,  
61 scTE could accurately recover the expected pattern of heterogeneous MERVL  
62 expression. Then, we applied our approach to several biological systems including  
63 human *in vitro* cardiac differentiation, mouse gastrulation, adult mouse somatic cells,  
64 the induced pluripotent reprogramming process and human disease data. Overall, we  
65 unveil hitherto unknown insights into complex TE expression patterns in mammalian  
66 development and human diseases.

67

## 68 **Results**

### 69 **Quantification of TE expression in single cells with scTE**

70 Analysis of TEs pose special challenges as they are present in many hundreds to  
71 millions of copies within the genome. A common strategy in regular analyses is to  
72 discard multiple mapped reads, however this leads to loss of information from TEs<sup>21</sup>.  
73 Assigning these reads to the best alignment location is the simplest way to resolve  
74 TE-derived reads, but it is not always correct for individual copies<sup>21,22</sup>. To solve this  
75 problem, we designed an algorithm in which TE reads are allocated to TE metagenes  
76 based on the TE type-specific sequence. We built a framework named scTE with this  
77 strategy, scTE maps reads to genes/TEs, performs barcode demultiplexing, quality  
78 filtering, and generates a matrix of read counts for each cell and gene/TE ([Fig. 1a and](#)

79 [Supplementary Fig. 1a](#)). scTE is easy to use, and its output is designed to be easily  
80 integrated into downstream analysis pipelines including, but not limited to, Seurat and  
81 SCANPY<sup>23,24</sup>. The algorithm can in principle be applied to infer TE activities from any  
82 type of single-cell sequencing based data, like single-cell ATAC-seq data, DNA  
83 methylation, and other single-cell epigenetic data.

84 We first tested scTE's ability by *in silico* mixing two cells lines, MEFs (mouse  
85 embryonic fibroblasts) and ESCs in different ratios<sup>25</sup>. Comparison with the gene-based  
86 Cell Ranger pipeline<sup>26</sup>, scTE shows nearly identical topology in a UMAP (Uniform  
87 Manifold Approximation and Projection) plot, and in marker genes expression ([Fig. 1b](#)  
88 [and Supplementary Fig.1b](#)). Even when one cell type only contributes a 1% minority  
89 in the mixture, scTE identified it correctly ([Fig. 1b](#)), indicating that scTE did not  
90 influence the global analysis of gene expression. These results demonstrate the  
91 sensitivity of scTE.

92 Next, we sought to explore TE expression, around 12-14% of the reads were  
93 derived from TEs ([Fig. 1c](#)). Requiring at least 2-fold change and FDR<0.05, scTE  
94 detected 150 significantly differentially expressed TEs between ESCs and MEFs  
95 ([Supplementary Fig. 1c](#)), including ERVB7\_1-LTR\_MM, which is highly expressed in  
96 ESCs, and RMER10B in MEFs ([Fig. 1d and Supplementary Fig.1d](#)). Furthermore,  
97 UMAP based on single cell TE expression alone could distinguish the cell types with  
98 the expected ratio ([Fig. 1e](#)), demonstrating TE expression discerns cell identity.

99

100 **Deciphering TE heterogeneity in mouse ESCs and during human cardiac**  
101 **differentiation**

102 It is known that a small subset of ESCs acquire a totipotent state named 2C-like cells  
103 and express a MERVL TE which also marks the embryonic 2-cell stage<sup>19,27,28</sup>. scTE  
104 could correctly identify this rare 2C-like subpopulation in UMAP plots, based on the  
105 specific marker genes *Zscan4c* and *Tcstv3*, and the expression of MERVL and  
106 MT2\_Mm TEs (Fig. 2a, b and Supplementary Fig. 2a, b)<sup>19,29</sup>. If we discarded multiple  
107 mapped reads and only considered unique reads, the level of MERVLs was reduced,  
108 but it was still specifically expressed in the 2C-like cells (Supplementary Fig. 2c). This  
109 confirms that scTE can correctly identify known TE patterns.

110 In humans, HERV-H LTRs are expressed in early embryos and human pluripotent  
111 stem cells (hPSCs), and contribute to pluripotency maintenance and somatic  
112 reprogramming<sup>6,30-32</sup>, but little is known about TE expression dynamics during  
113 differentiation to somatic cells. Applying scTE to an scRNA-seq time series of hPSCs  
114 differentiating to cardiomyocytes<sup>33</sup>, we accurately recovered the repression of HERV-  
115 H LTRs including LTR7 and HERVH-int during differentiation, concomitant with  
116 reduction in the expression of the pluripotency factor *POU5F1* (Fig. 2c, d and  
117 Supplementary Fig. 2d). During *in vitro* cardiac differentiation of hPSCs there is a  
118 bifurcation towards definitive cardiomyocytes (dCM) and non-contractile cells (Fig. 2c).  
119 Between these two branches, marked by *NKX2-5* and *SPARC*, respectively, we found  
120 differential expression of TEs such as LTR32, MER57A-int and MER45A in the dCM  
121 cells, whilst, MLT1H1, HERVIP10B-int and LTR5A were specifically expressed in the  
122 non-contractile cells (Fig. 2e, f and Supplementary Fig. 2e). Independent bulk RNA-  
123 seq data<sup>34</sup> demonstrated that these TEs were expressed in late cardiac differentiation  
124 (Supplementary Fig. 2f), however, as the bulk is a mixture of dCM and non-contractile  
125 cells, the restriction of these TEs to divergent fates can only be observed in the

126 scRNA-seq data. This highlights the importance of analyzing TE expression in sc-  
127 RNA-seq data, as MLT1H1 is very high in the bulk RNA-seq, but this hides the reality  
128 that it is restricted to the non-contractile cells and plays no role in dCMs (Fig. 2e, f and  
129 [Supplementary Fig. 2f](#)).

130

### 131 **Analysis of TEs in mouse gastrulation and early organogenesis reveals the** 132 **widespread cell fate-specific expression of TEs**

133 The previous analysis showed how TE expression contributed to *in vitro* cardiac  
134 differentiation, next we explored complex *in vivo* developmental processes. TE  
135 expression is dynamic during pre-implantation development<sup>6</sup>, however the expression  
136 of TEs in gastrulation has not been described. We took advantage of the single-cell  
137 time course of mouse gastrulation<sup>16</sup>. Analysis with scTE did not introduce any  
138 unexpected sample-bias, and a side-by-side comparison could retrieve similar  
139 patterns of marker gene expression in the expected lineages (Fig. 3a and  
140 [Supplementary Fig. 3a-f](#)). We found every lineage expressed a series of lineage-  
141 specific TEs (Fig. 3a, b, and [Supplementary Fig. 4a-c](#)). In the extraembryonic  
142 ectoderm cells, IAP and RLTR45-family TEs were activated (Fig. 3b, c), and in *Apoa2+*  
143 extraembryonic endoderm cells, MER46C, RLTR20B3 and LTRIS2 were up-regulated  
144 (Fig. 3b, d). The expression of these TEs was validated using bulk RNA-seq from *in*  
145 *vitro*<sup>35-37</sup> mimics of these embryonic stages including ESCs, epiblast stem cells  
146 (EpiSCs), extraembryonic endoderm cells (XENs) and trophoblast stem cells (TSCs)  
147 (Fig. 3e). Other embryonic lineages, particularly the *Gypa+* erythroid and the *Tnnt2+*  
148 cardiomyocyte lineages expressed specific TEs such as L1\_Mur and L1ME3D,  
149 respectively (Fig. 3b, f).

150 As this dataset provides dynamic trajectories for each lineage, we wondered if  
151 TEs were transiently activated during cell fate commitment. To this end, we noticed  
152 ETnERV3-int, whose expression coincides with the early development of the cardiac  
153 fate from the mesoderm, and is reduced in *Tnnt2*<sup>+</sup> cells, while L1ME3D was expressed  
154 in the *Tnnt2*<sup>+</sup> cells (Fig. 3g). Consistently, ETnERV3-int was specifically expressed in  
155 *in vitro* derived cardiomyocytes, which more closely resemble a fetal state, whilst  
156 L1ME3D was expressed only in the mature heart (Fig. 3h)<sup>38,39</sup>. However, the bulk  
157 samples could not capture the complexity of the transient expression of ETnERV3-int  
158 which extended from the late epiblast into the endoderm and mesoderm. To expand  
159 on this, we reanalyzed an scRNA-seq dataset of the developing mouse embryonic  
160 heart<sup>40</sup> (Fig. 3i and Supplementary Fig. 5a-c), and found that ETnERV3-int was  
161 expressed in the myocardium and epicardium, but not in the endocardium, neural crest  
162 and embryonic cells (Fig. 3j). L1ME3D was expressed in *Tnnt2*<sup>+</sup> myocardium,  
163 however in an inverse pattern with respect to ETnERV3-int (Fig. 3j, k). Therefore,  
164 ETnERV3-int activity is present in an intermediate stage in cardiac lineage  
165 development. Intriguingly, there was a close relationship between the expression of  
166 ETnERV3-int and *Isl1* gene, which marks multipotent progenitors<sup>40</sup> (Fig. 3j). These  
167 results highlight the complex patterns of TE expression in developmental processes.

168

### 169 **Widespread tissue-specific expression of TEs in somatic cells**

170 TE activity is considered to be silenced in somatic cells except LINE-1 expression and  
171 retrotransposition in the developing brain<sup>27,28,41</sup>. As we revealed unexpected  
172 heterogeneity of TEs in somatic MEFs and during organogenesis, we next measured  
173 TE expression in somatic cells using the Tabula Muris large scale scRNA-seq dataset



174 that profiles 20 mouse organs<sup>42</sup> (Fig. 4a). Surprisingly, our analysis revealed in total  
175 130 TEs that were specifically expressed in distinct cell types (Fig. 4b and  
176 Supplementary Fig. 6a). These associations include the expected expression of LINE1  
177 elements in brain cells, of which many L1 family members like L1MEh, L1M, L1MC4a,  
178 L1MA7 and L1P5 elements are specifically expressed in oligodendrocytes or microglia  
179 (Fig.4c and Supplementary Fig. 6a). We also found expression of LTR58, MLT1EA-  
180 int, MER110 and RLTR46 that specifically in B cells, T cells, type B pancreatic cells  
181 and hepatocytes, respectively (Fig.4c). Next, we took advantage of the Tabula Muris  
182 dataset to measure overall TE expression heterogeneity, and, in general, the LTRs  
183 and DNA transposons are the major source of heterogeneity (Fig. 4d, e).

184 TE expression is regulated by chromatin modification and transcription factors  
185 (TFs)<sup>3</sup>, thus, we wondered if we could infer the regulatory network between TFs and  
186 TEs from large scale scRNA-seq data, taking advantage of the improved cell type  
187 definitions from the scRNA-seq data. The co-expression relationships often reflect  
188 biological processes in which many genes with related functions are coordinately  
189 regulated. Therefore, we reasoned that if a TE is regulated by a TF, they should be  
190 co-expressed. To identify TF-TE regulatory relationships, we performed co-expression  
191 analysis, and revealed the specific co-clustering of neural genes and TEs (*Sox2* and  
192 *Olig1*), the immune system (*Cebpe*, *Tcf7*, *Pax5* and *Sall1*), the endoderm/pancreas  
193 (*Gfi1b*, *Nkx6-1* and *E2f8*), and other lineages (Fig. 4f and Supplementary Fig. 6b).  
194 Motif analysis also showed that the SOX2 motif was significantly enriched within  
195 RLTR13F TEs (Supplementary Fig. 6c). These results highlight the deep link between  
196 TE and TF activity indicating those TFs may be responsible for activating TEs in the  
197 corresponding cell types.

198 We next explored in closer detail neural and immune cell lineages as TE activity  
199 is known to regulate neural activity and immune responses<sup>43-45</sup>. Subgrouping the cells  
200 from microglia and neuron samples identified several distinct cell types  
201 (Supplementary Fig. 7a-c), within which cell type-specific expression of TEs was  
202 observed (Supplementary Fig. 7d, e). Next, with the pooled immune cells from marrow,  
203 spleen and thymus, 12 distinct immune cell subtypes were defined (Supplementary  
204 Fig. 7f, g). Intriguingly, besides finding additional cell type-specific TEs in T cells, B  
205 cells and granulocytes, a series of TEs were restricted to subtypes of T cells and B  
206 cells (Supplementary Fig. 7h, i). These data show different degrees of subtype  
207 specific signatures of TEs in the neural and immune system, and highlight the  
208 importance of looking beyond only genes when exploring how those systems differ.

209

### 210 **TEs are activated during somatic cell reprogramming, in a heterogenous and** 211 **cell branch restricted manner**

212 The above analysis has revealed the well-ordered dynamic expression of TEs in  
213 developmental processes, we then wondered if TEs undergo similar stage-specific  
214 regulation during somatic reprogramming. Somatic cells can be reprogrammed to  
215 induced pluripotent stem cells (iPSCs) by various methods, such as ectopic  
216 expression of a group of pluripotency transcription factors<sup>25,46,47</sup>, or cocktails of  
217 chemicals<sup>48,49</sup>. The reprogramming process is highly heterogeneous, with abundant  
218 non-reprogramming cells and divergent cell fate transition routes<sup>25,50</sup>. We took  
219 advantage of reprogramming scRNA-seq data to investigate the activity of TEs during  
220 these drastic cell fate transitions. Reprogramming induced by *Oct4/Pou5f1*, *Klf4*, *Sox2*  
221 and *c-Myc* (OKSM) generates detectable intermediate branches, including iPSCs,

222 trophoblast, stromal and neural-like cells (Fig. 5a and Supplementary Fig. 8a-d)<sup>50</sup>. We  
223 identified specifically expressed TEs in each cell branch (Supplementary Fig. 8a-d).  
224 For example, the TEs ERVB7\_1-LTR\_MM, IAPEz-int, RLTR4\_Mm, and Lx were  
225 specifically expressed in iPSCs, trophoblast, stromal and neural-like branches,  
226 respectively (Fig. 5b). ERVB7\_1-LTR\_MM (MusD) and IAPs are up-regulated during  
227 reprogramming<sup>51</sup>, however using scRNA-seq data we show that only ERVB7\_1-  
228 LTR\_MM, as well as ETnERV-int and RLTR13G, were up-regulated in the successful  
229 reprogramming route, initiating at the mesenchymal-to-epithelial transition (MET) and  
230 peaking at the iPSCs stage (Fig. 5b and Supplementary Fig. 8a). In contrast, the  
231 trophoblast-branch expressed IAPEz-int and IAPLTR1\_Mm (Fig. 5b and  
232 Supplementary Fig. 8c), which are also expressed in *in vivo* extra embryonic ectoderm  
233 cells (Fig. 3c), suggesting consistent regulation between development and  
234 reprogramming.

235 We then analyzed reprogramming induced by *Oct4*, *Klf4*, and *Sox2* (OKS)<sup>25</sup> or  
236 only chemicals<sup>29</sup>. There are two validated branches during OKS-mediated  
237 reprogramming<sup>25</sup> (Fig. 5c), and we found many TEs, such as ERVB7\_1-LTR\_MM, that  
238 were specifically up-regulated in the reprogramming-potential (RP) branch, and were  
239 excluded from the non-reprogramming branch (Fig. 5d and Supplementary Fig. 8e).  
240 IAPEz-int and IAPLTR1\_Mm were expressed in the RP branch but were ultimately  
241 silenced in the reprogrammed cells (Fig. 5e, f), suggesting IAPs were only activated  
242 in a pre-reprogrammed state and may impede the final step of pluripotency acquisition.  
243 We validated the expression of ERVB7\_1-LTR\_MM and IAPs by qRT-PCR  
244 (Supplementary Fig. 8f), demonstrating that IAPs are silenced in ESCs. Similar to  
245 OKS-mediated reprogramming, chemical-mediated reprogramming bifurcates into two

246 branches (Fig. 5g and Supplementary Fig. 8g)<sup>29</sup>, and TEs, marking an intermediate  
247 2C-like program, were activated at the root of the successful branch (Supplementary  
248 Fig. 8h, i). ERVB7\_1-LTR\_MM and RLTR13G were specifically up-regulated in the  
249 successful branch, whilst IAPEz-int and IAPLTR1\_Mm were activated in the pre-  
250 branch and failed branch (Fig. 5h and Supplementary Fig. 8j, k).

251 The similar expression pattern of TEs among the three distinct reprogramming  
252 systems described above, suggests there are common regulatory mechanisms.  
253 Indeed, we found IAPLTR1\_Mm TEs are rich in DNA-binding motifs for JUN and IRF2  
254 (Supplementary Fig. 8l), whose expression closely matched IAP expression in all  
255 three reprogramming systems (Supplementary Fig. 8m) and are known to impair  
256 reprogramming<sup>52,53</sup>. This suggests that their downregulation deactivates the IAPs  
257 before the finalization of reprogramming, indicating IAPs may impede the final step of  
258 reprogramming. Overall, these results indicate TEs have a deeper unappreciated role  
259 in iPSC formation.

260

### 261 **Inferring TE Associated Accessibility from scATAC-seq Data**

262 Beyond scRNA-seq, many other single-cell sequencing techniques<sup>54-56</sup> have shown  
263 great potential to explore cell heterogeneity and increased insight could be fueled by  
264 the additional information provided by scTE. For instance, we reasoned that scTE  
265 would be informative for the analysis of scATAC-seq data and potentially other single-  
266 cell epigenetic data because TEs have a wide array of chromatin states<sup>3</sup>, are widely  
267 bound by transcription factors<sup>57</sup>, and can act as enhancers<sup>14</sup> (Fig. 6a). We then applied  
268 scTE to a dataset of fluorescence-activated cell sorted (FACS) mouse cells<sup>58</sup>,  
269 including cardiac progenitor cells (CPCs), CD4<sup>+</sup> T cells, ESCs and skin fibroblasts

270 (SFs). Intriguingly, scTE could accurately recover the expected cell types, based on  
271 only the reads that mapped to TEs (Fig. 6b). Specific accessibility of RLTR13A,  
272 RLTR4\_Mm, RLTR13G and RMER19B/C was found in the CPCs, CD4+ T cells, ESCs  
273 and SFs, respectively (Fig. 6c, d and Supplementary Fig.9a). And motif enrichment of  
274 these cell-type specific TEs revealed known master regulators of these cell types, such  
275 as GATA4/HAND1/T for CPCs, ETS1/TCF3 for T cells, SOX2/POU5F1/NR5A2 for  
276 ESCs and FOS/MAF for SFs (Supplementary Fig. 9b), indicating these TEs may act  
277 as cis-regulatory elements bound by transcription factors. For instance, scTE reveals  
278 there is an RLTR13A TE within an intron of *Smyd1*, a gene essential for heart  
279 development<sup>59-61</sup>, which was specifically open in CPCs (Fig. 6e), and was specifically  
280 expressed in the myocardium of the fetal heart (Fig. 6f). Applying scTE to scATAC-  
281 seq data of peripheral blood monocyte cells (PBMC) was also able to recover the  
282 major cell types and cell type-specific TEs (Supplementary Fig. 8c-f), which can be  
283 validated by independent bulk ATAC-seq data from FACS sorted cells (Supplementary  
284 Fig. 8g)<sup>62</sup>. These results indicate that quantifying chromatin accessibility on TE regions  
285 is informative for characterizing cell types and may assist the problems posed by  
286 scATAC-seq analysis due to its especially sparse nature<sup>63</sup>.

287

## 288 **Disease-specific expression of TEs**

289 The unexpected widespread TE heterogeneity amongst embryonic and somatic cell  
290 types and cell fate transitions raised the question as to whether there is TE  
291 heterogeneity in diseased cells. Alzheimer's disease (AD) is an age-associated  
292 neurodegenerative disorder that is characterized by progressive memory loss and  
293 cognitive dysfunction for which there is no known cure. TEs have been reported to be

294 highly active during aging and may contribute to age-dependent loss of neuronal  
295 function<sup>64</sup>. To explore the expression of TEs in AD, we reanalyzed the scRNA-seq  
296 data from a mouse model of AD expressing five human familial AD gene mutations,  
297 which contained 13,114 single cells with age and sex-matched wild-type (WT) controls  
298 using the MARS-seq platform<sup>65</sup> (Fig. 7a). Projecting the cells with a UMAP, we  
299 recovered the major groups of cells in AD and WT, including the unique disease-  
300 associated microglia cluster cells (M2) identified in the original study (Fig. 7b and  
301 Supplementary Fig. 10a). Differential expression analysis demonstrated significant  
302 changes in gene expression in M2, including previously described AD risk factors such  
303 as *ApoE*, *Tyrobp*, *Lpl*, *CstII* and *Trem2* (Fig. 7c and Supplementary Fig. 10b).  
304 Intriguingly, we also found many TEs such as ERVB7\_2-LTR\_MM, RLTR17, RLTR28  
305 and Lx4B that were significantly higher and specifically expressed in M2 (Fig. 7c, d  
306 and Supplementary Fig. 10c), indicating those TEs may also be involved in AD  
307 development.

308 Type 2 diabetes (T2D) is a common human disease caused by a combination of  
309 increased insulin resistance and reduced mass or dysfunction of pancreatic beta cells.  
310 We reanalyzed scRNA-seq from two independent studies of the human pancreas in  
311 healthy and T2D individuals<sup>66,67</sup>. The major cell types in the pancreas, including alpha,  
312 beta, gamma/PP and delta cells clustered without a visible disease-specific pattern,  
313 indicating no drastic change in cell type (Fig. 7e and Supplementary Fig. 10d).  
314 Contrasting the transcriptome from healthy and T2D in each cell type independently,  
315 *CD36* and *DLK1* was up-regulated in T2D alpha and beta cells respectively (Fig. 7f),  
316 as reported by the original studies<sup>66,67</sup>. Notably, many TEs were significantly highly  
317 expressed in T2D beta cells, including L1MC, L1MA4A, Tigger3a, MLT2B4. This

318 differential expression pattern was near identical between the two independent  
319 datasets (Fig. 7f). Critically, none of these observations could be observed using bulk  
320 RNA-seq datasets (Fig. 7g and Supplementary Fig. 10e)<sup>66,68</sup>, which might be due to  
321 the high expression of these TEs in both normal and T2D alpha cells, emphasizing the  
322 importance of analysis at single-cell resolution.

323 As a final human disease dataset we reanalyzed a glioblastoma scRNA-seq  
324 experiment<sup>69</sup>, and were able to identify TEs specifically expressed in neoplastic cells  
325 and that were correlated with the expression of *EGFR* (Supplementary Fig. 10f-h), a  
326 gene upregulated in a large percentage of glioblastomas<sup>69</sup>. Above all, these results  
327 revealed the dysregulation of TE expression in diseased human cells, which deserves  
328 further mechanistic study and may help to identify new diagnostic markers and  
329 therapeutic targets.

330

## 331 Discussion

332 TEs are the most abundant elements in the genome, however, the understanding of  
333 their impact on genome evolution, function and disease remains limited. The rise of  
334 genomics and large-scale high-throughput sequencing has shed light on the multi-  
335 faceted role of TEs. However, many genomic studies exclude TEs due to difficulties  
336 in their analysis as a consequence of their repetitive nature<sup>21</sup>. Thus, TE analysis often  
337 requires the use of specialized tools to extract meaning<sup>5,22</sup>. Here, we developed scTE  
338 specifically for the analysis of TEs from single-cell sequencing data. By taking  
339 advantage of this tool we could recover previously identified phenomena such as  
340 MERVL and LTR7/HERVH expression in mouse and human ESCs, respectively. We  
341 then revealed widespread heterogeneity of TE expression throughout embryonic

342 development, in mature somatic cells, during the reprogramming process and in  
343 human diseases, and discovered a wealth of cell fate-specific TE expression. These  
344 associations with cell fate cannot be observed when only considering bulk samples,  
345 demonstrating the enormous power of single-cell sequencing, and the importance of  
346 analyzing TE expression.

347 One of the key findings of our analysis has revealed the various TEs that are  
348 specifically expressed in different cell types. The expression of TEs during the pre-  
349 implantation development stage has been demonstrated previously<sup>6</sup>, our findings  
350 extend this to gastrulation and early organogenesis. We find a wide array of  
351 expression of TEs in the extraembryonic tissues, which may be related to their activity  
352 as enhancers<sup>70</sup>. Furthermore, we show the expression of TEs within the specific  
353 lineages in the developing fetal heart. In addition, TEs are also heterogeneously  
354 expressed between cell types in adult somatic cells, which has not been demonstrated  
355 before, as TEs are thought to be primarily silent in adult tissues. Notably, we found a  
356 vast of trove of TEs that are expressed in the brain and the immune system, and  
357 individual TE types that are specifically expressed in different sub cell types.  
358 Considering the close relationship between the evolution of immune system, brain and  
359 TEs<sup>43-45</sup>, these results hint at further functions for TEs in these two systems.

360 How cells decide their fate is a fundamental question in biology. Stem cell  
361 differentiation and somatic cell reprogramming are both powerful *in vitro* models that  
362 mimic *in vivo* development and have provided great insight into cell fate decisions.  
363 However, how TEs are involved in these processes is still largely unknown. In this  
364 study, we have identified the TEs LTR32 and MLT1H1 that were differentially  
365 regulated between contractile and non-contractile cell fate decisions during human



366 cardiac differentiation. In addition, we also found ERVB7\_1-LTR\_Mm and IAP  
367 elements divergent expression during reprogramming, whereas ERVB7\_1-LTR\_Mm  
368 may promote iPSC formation, IAP elements need to be silenced at the final stage  
369 before iPSCs formation (Fig. 5b, f, h). These mechanisms are shared among the  
370 Yamanaka factor based and chemical based reprogramming systems, indicating a  
371 tight association between TEs and cell fate decisions.

372         Considering the growing implication that TEs are important contributors to human  
373 disease, their study is becoming increasingly important. In addition to the ability of TEs  
374 to impact genomic stability as they duplicate<sup>71</sup>, which has clear implications for the  
375 development of cancer<sup>72</sup>, TEs are also playing more subtle roles in epigenetic control  
376 and transcript expression. For example, TEs are spliced into chimeric transcripts that  
377 drive the expression of oncogenes<sup>11</sup>. Similarly, the expression of TEs has been  
378 associated with several nervous system-related disorders, including  
379 neurodegeneration<sup>10</sup>, and L1 LINE expression is important in inflammation during  
380 aging<sup>73</sup>. In our work, we demonstrate that in single cells of the pancreas there is  
381 substantial TE expression deregulation in the beta cells, which is suggestive of  
382 epigenetic dysfunction and a loss of control over TE expression. Critically, this  
383 observation cannot be observed from bulk pancreatic islet samples. Considering the  
384 growing importance of exploring human disease using primary patient samples, the  
385 analysis of TEs should be included. However, to date the contribution of TE expression  
386 to the aging and diseased states remains relatively unexplored. Our approach will be  
387 an important tool in understanding the contributions of TEs to cellular heterogeneity in  
388 a variety of systems and in human disease.

389

## 390 **Methods**

### 391 **Software availability**

392 scTE is available at <https://github.com/jphe/scTE>. The code is freely available and is  
393 released under the MIT license. scTE requires Python >3.6, and the python module  
394 numpy, scTE supports the Linux and Mac platforms. Software code for the analysis of  
395 the data in this manuscript can be found at:  
396 <https://github.com/jphe/scTE/tree/master/example>.

397

### 398 **scTE pipeline**

399 The input data for scTE consists of the annotation files for genes and TEs, and  
400 alignment files in either the SAM or BAM format<sup>74</sup>. By default, scTE uses GENCODE<sup>75</sup>  
401 and the UCSC genome browser Repeatmasker track<sup>76</sup> annotations for genes and TEs,  
402 respectively. The SAM/BAM file contains the aligned read genome locations. Many  
403 alignment programs can distinguish reads that have a unique alignment in the genome  
404 (termed unique-reads) or map to multiple genomic loci (termed multimapping reads or  
405 non-unique reads). Multimapping reads are critical for TE quantification, as TEs  
406 contain many repeated sequences and non-unique reads often map inside the TEs.  
407 To get an accurate quantitation of the number of reads mapping to TEs these reads  
408 should be preserved. However, in many analysis pipelines these reads are discarded.  
409 scTE recommends aligners to keep all of the mapped reads, and we recommend that  
410 the best single aligned multimapped read be kept. The reads can be aligned by any  
411 genome aligner, but the aligned reads must be against the genome (i.e. not against a  
412 set of genes or transcript assembly). scTE is most tuned to STAR-solo<sup>77</sup> or the Cell  
413 Ranger pipeline outputs, and can accept BAM files produced by either of these two

414 programs. For other aligners, the barcode should be stored in the 'CR:Z' tag, and the  
415 UMI in the 'UR:Z' tag in the BAM file. If the UMI is missing or not used in the scRNA-  
416 seq technology (for example on the Fluidigm C1 platform), it can be disabled with –  
417 UMI False (the default is True) switch in scTE. If the barcode is missing it can be  
418 disabled with the –CB False (the default is True), and instead the cell barcodes will be  
419 taken from the names of the BAM files (multiple BAM files can be provided to scTE  
420 with the –i option).

421

## 422 **scTE gene and TE indices**

423 scTE builds genome indices for the fast alignment of reads to genes and TEs. These  
424 indices can be automatically generated using the commands:

```
425 scTE_build -g mm10 # mouse genome
```

```
426 scTE_build -g hg38 # human genome
```

427 These two scripts will automatically download the genome annotations, for mouse:

```
428 ftp://ftp.ebi.ac.uk/pub/databases/gencode/Gencode\_mouse/release\_M21/gencode.vM21.annotation.g  
429 tf.gz
```

```
430 http://hgdownload.soe.ucsc.edu/goldenPath/mm10/database/rmsk.txt.gz
```

431 Or for human:

```
432 ftp://ftp.ebi.ac.uk/pub/databases/gencode/Gencode\_human/release\_30/gencode.v30.annotation.gtf  
433 .gz
```

```
434 http://hgdownload.soe.ucsc.edu/goldenPath/hg38/database/rmsk.txt.gz
```

435 These annotations are then processed and converted into genome indices. The scTE  
436 algorithm will allocate reads first to gene exons, and then to TEs, by default. Hence  
437 TEs inside exon/UTR regions of genes annotated in GENCODE will only contribute to  
438 the gene, and not to the TE score. This feature can be changed by setting '–mode/-m  
439 exclusive' in scTE, which will instruct scTE to assign the reads to both TEs and genes  
440 if a read comes from a TE inside exon/UTR regions of genes.

441

## 442 **Analysis of 10x-style data**

443 scRNA-seq data was processed using the scTE 10x pipeline, Briefly, reads were  
444 aligned to the genome using STARsolo<sup>77</sup> with the setting ‘--outSAMattributes NH HI  
445 AS nM CR CY UR UY --readFilesCommand zcat --outFilterMultimapNmax 100 --  
446 winAnchorMultimapNmax 100 --outMultimapperOrder Random --runRNGseed 777 --  
447 outSAMmultNmax 1’. The default scTE parameters for 10x were used to get the  
448 molecule count matrix. The count matrix was lightly filtered to exclude cell barcodes  
449 with low numbers of counts: Cells with less than 1000 UMIs and less than 500 genes  
450 detected were filtered out, and only the top 10,000 cells with the highest gene count  
451 were kept (these default setting can be altered with the ‘--expect-cells, --min\_count  
452 and --min\_genes’ switches in scTE, note that the cell counts are further filtered on a  
453 case-by-case basis for each experiment, as detailed below). Other downstream  
454 analysis was performed by SCANPY<sup>24</sup>. Specific analysis settings for the individual  
455 datasets are described below.

456

## 457 **Analysis of C1/SMART-seq-style data**

458 scRNA-seq data were processed using the scTE C1/SMART-seq pipeline, Briefly,  
459 reads were aligned to the genome using STAR<sup>77</sup>, with the setting ‘--  
460 winAnchorMultimapNmax 100 --outSAMmultNmax 1 --outSAMmultNmax 1’. The  
461 default scTE parameters for C1/SMART-seq were used to get the molecule count  
462 matrix. Cells with less than 10,000 counts and less than 2000 expressed genes were  
463 filtered out. Cells with more than 20% fraction of mitochondrial counts were discarded.  
464 Downstream analysis was performed the same as for the 10x data pipeline. Fluidigm

465 C1/SMART-seq data comes as a single BAM file per barcode. To analyze this data,  
466 the 'barcode' is taken from the input BAM filenames, and both -CB and -UMI should  
467 be False:

```
468 scTE -i *.bam -p 4 -o <output_name> --genome mm10 -x mm10.exclusive.idx -CB False -UMI  
469 False
```

470 The resulting matrices can then be integrated into an scRNA-seq analysis pipeline.

471

### 472 **Analysis of human cardiac differentiation scRNA-seq data**

473 The raw data were download from E-MTAB-6268<sup>33</sup>. As this data was generated using  
474 the Single Cell 3' Library, Gel Bead and Multiplex kit (version 1, 10x Genomics, Cat.  
475 #PN-120233), the cell barcode and UMI sequence are not in the same read. First, we  
476 merged the cell barcode and UMI sequence into the same read using a custom script,  
477 and then aligned the modified fastq file to the hg38 genome using STARsolo, as  
478 described above. Cells with less than 500 expressed genes/TEs and cells that have  
479 more than 20% fraction of mitochondrial reads were discarded. Single cell trajectory  
480 was analyzed by Harmony<sup>78</sup> and the top 1000 highly variable genes were used for  
481 PCA, and the force directed layout was computed using first 150 PCs (principle  
482 components). Differentially expressed genes and TEs were analyzed using the  
483 SCANPY rank\_genes\_groups functions by t-test method, the top 500 specifically  
484 expressed TEs and genes with Benjamini-Hochberg corrected p-value <0.01 and  
485 log<sub>2</sub>(fold-change) > 0.5 are selected for downstream analysis.

486

### 487 **Analysis of the gastrulation scRNA-seq data**

488 The raw data was download from E-MTAB-6967, and aligned to the mm10 genome  
489 using STARsolo<sup>77</sup>, with the parameters ‘--readFilesCommand zcat --  
490 outFilterMultimapNmax 100 --winAnchorMultimapNmax 100 --outMultimapperOrder  
491 Random --runRNGseed 777 --outSAMmultNmax 1’. Cells with less than 3000  
492 expressed genes/TEs, and less than 8000 UMIs were discarded. Genes expressed in  
493 less than 50 cells were removed from the analysis. The count matrix was normalized  
494 using `normalize_total` function of SCANPY, and the top 2000 most highly variable  
495 genes were used for PCA, and the first 20 PCs (principle components) were used, as  
496 described in the original publication<sup>16</sup>. UMAP plots were generated (`min_dist=0.6`).  
497 Data is from E-MTAB-6967<sup>16</sup>.

498

#### 499 **Analysis of Tabula Muris scRNA-seq data**

500 The C1/Smart-seq2 scRNA-seq raw data was download from GSE109774<sup>42</sup>, the  
501 reads were aligned to the mm10 genome using STAR with the parameters ‘--  
502 readFilesCommand zcat --outFilterMultimapNmax 100 --winAnchorMultimapNmax  
503 100 --outMultimapperOrder Random --runRNGseed 777 --outSAMmultNmax 1’. The  
504 genes/TEs and cell expression matrix was generated using scTE. Cells with less than  
505 50000 counts or more than  $2^7$  counts, less than 1000 expressed genes, or more than  
506 20% fraction of mitochondrial counts were removed. The filtered matrix was  
507 normalized using `scrn`<sup>79</sup>. The top 4000 most highly variable genes were used for PCA,  
508 and the first 50 PCs were used for downstream analysis. The cell cluster specific  
509 expressed genes/TEs was calculated using SCANPY `rank_genes_groups` functions  
510 by t-test method, the top 500 specifically expressed TEs and genes with Benjamini-

511 Hochberg corrected p-value  $<0.01$  and  $\log_2(\text{fold-change}) >0.5$  compare to all other  
512 groups of cells were kept.

513

#### 514 **Analysis of the OKSM/Chemical reprogramming data**

515 The raw data were download from GSE115943<sup>50</sup> and GSE114952<sup>29</sup>. Cells with less  
516 than 10000 UMIs or more than 1000000 UMIs, or expressed less than 1000 expressed  
517 genes, or more than 20% fraction of mitochondrial counts were removed. The filtered  
518 matrices were normalized using scran<sup>79</sup>. The top 4000 most highly variable genes  
519 were used for PCA, and the first 50 PCs were used for downstream analysis. The cell  
520 trajectory routes were taken from the original studies. Differentially expressed  
521 genes/TEs were calculated using SCANPY rank\_genes\_groups functions by the t-test  
522 method, the TEs and genes with Benjamini-Hochberg corrected p-value  $<0.01$  and  
523  $\log_2(\text{fold-change}) >0.5$  compared to all other branches of cells were kept.

524

#### 525 **Analysis of the OKS reprogramming data**

526 The C1/SMART-seq data were taken from GSE103221<sup>25</sup>. the reads were aligned to  
527 the mm10 genome using STAR with the parameters '`--readFilesCommand zcat --  
528 outFilterMultimapNmax 100 --winAnchorMultimapNmax 100 --outMultimapperOrder  
529 Random --runRNGseed 777 --outSAMmultNmax 1`'. The genes/TEs and cells  
530 expression matrix was generated using scTE. Cells with less than 10000 counts or  
531 more than  $2^7$  counts, less than 1000 expressed genes, or more than 20% fraction of  
532 mitochondrial counts were removed. The filtered matrix was normalized using scran  
533 <sup>79</sup>. The top 4000 most highly variable genes were used for PCA, and the first 50 PCs  
534 were used for downstream analysis. The genes/TEs expression trajectories on

535 pseudotemporal orderings of cells (Fig. 5e) were analyzed by LineagePulse  
536 (<https://github.com/YosefLab/LineagePulse>) according to the pseudotime taken from  
537 the original study.

538

### 539 **Analysis of the embryonic heart scRNA-seq data**

540 The raw data was download from GSE126128<sup>40</sup>. This data was aligned to the genome  
541 using STARsolo<sup>77</sup>, as described above. Cells with less than 3000 expressed  
542 genes/TEs and the cells with less than 8000 UMIs or more than 100000 UMIS were  
543 deleted from the analysis. The count matrix was normalized using `normalize_total`  
544 function of SCANPY. The top 2000 most highly variable genes were used for PCA,  
545 and the first 20 PCs were used for downstream analysis. UMA projections were  
546 generated (`min_dist=0.7`).

547

### 548 **Analysis of Alzheimer's disease scRNA-seq data**

549 The MARS-seq scRNA-seq raw data were download from GSE98969<sup>65</sup>. The raw fastq  
550 file were modified using custom scripts to embed the cell barcode and UMI in the same  
551 read, as in the 10x scRNA-seq format. The modified reads were aligned to the mm10  
552 genome with STARsolo as described above. Cells with less than 5000 UMIs or more  
553 than 1000000 UMIs, or expressed less than 500 genes, or more than 20% fraction of  
554 mitochondrial counts, were removed. The filtered matrix was normalized using `scrn`<sup>79</sup>.  
555 The top 4000 most highly variable genes were used for PCA, and the first 50 PCs  
556 were used for downstream analysis. The differentially expressed genes and TEs  
557 between M2 and M1/3 were analyzed using SCANPY `rank_genes_groups` functions



558 by t-test method, the genes or TEs with Benjamini-Hochberg corrected p-value <0.01  
559 and log<sub>2</sub>(fold-change) >0.5 compared to each other were kept.

560

### 561 **Analysis of the Type 2 diabetes/glioblastoma sc-RNA-seq data**

562 The raw data was download from GSE86473<sup>66</sup>, GSE81608<sup>67</sup>. The data was aligned  
563 to the hg38 genome using STAR<sup>77</sup>, as described above for C1 data. Cells with less  
564 than 5000 expressed genes/TEs and cells with less than 1\*10<sup>6</sup> counts or more than  
565 6\*10<sup>6</sup> or were deleted from the analysis. The count matrix was normalized using the  
566 normalize\_total function of SCANPY. There was a strong batch effect based on the  
567 sex of the donor in the type 2 diabetes datasets, this was removed using the  
568 regress\_out function of SCANPY<sup>24</sup>. We did not detect any other batch effect from other  
569 confounding variables (age, body-mass index, race). The top 2000 most highly  
570 variable genes were used for PCA, and the first 15 PCs (type 2 diabetes) or 25 PCs  
571 (glioblastoma) were used. UMAP plots were generated using SCANPY (min\_dist=0.7).

572

### 573 **Bulk RNA-seq analysis**

574 Analysis of bulk RNA-seq was performed essentially as previously described<sup>3,80</sup>, with  
575 some modifications. Briefly, reads were aligned to the mouse or human  
576 genome/transcriptome (GENCODE transcript annotations, mouse M21 or human 30)  
577 using STAR (v2.7.1a)<sup>77</sup>. Tetranscripts<sup>81</sup> or scTE (with the setting -CB False -UMI False)  
578 was used to quantitate reads on TEs. Reads were GC normalized using EDASeq  
579 (v2.16.3)<sup>82</sup>, and analyzed using glbase<sup>83</sup>.

580

### 581 **Motif enrichment analysis**

582 The TF motif enrichment in TEs ([Supplementary Fig. 6c and 8l](#)) was measured using  
583 AME from the MEME suite<sup>84</sup> with the options “--control --shuffle”.

584

### 585 **Bulk ATAC-seq analysis**

586 Analysis of bulk RNA-seq was performed essentially as previously described<sup>3,85</sup>.  
587 Briefly, reads were aligned to the mouse or human genome (mm10 or hg38) using  
588 bowtie2 (v2.3.5.1), with the options: “-p 6 --mm --very-sensitive --no-unal --no-mixed -  
589 -no-discordant -X2000”, and reads mapping to TEs were counted using `te_counter`  
590 ([https://github.com/oaxiom/te\\_counter](https://github.com/oaxiom/te_counter)). The counts per million (CPM) reads metric  
591 was used for enrichment scores.

592

### 593 **Analysis of the scATAC-seq data**

594 We downloaded the scATAC-seq data from the 10x Illumina website  
595 ([https://support.10xgenomics.com/single-cell-atac/datasets/1.1.0/atac\\_pbmc\\_10k\\_v1](https://support.10xgenomics.com/single-cell-atac/datasets/1.1.0/atac_pbmc_10k_v1)). The  
596 barcode was inserted into the read name, so that the mapping could keep track of the  
597 cell ID. This yielded reads names inside the FASTQ, such as: (where  
598 CCACGTTGTGGACTGA sequence is the cell barcode)

599

```
600 @CCACGTTGTGGACTGA:A00519:269:H7FM2DRXX:1:1101:1325:1000 1:N:0:AAGCATAA
```

601

602 The data was aligned to the human hg38 genome using bowtie2<sup>86</sup> with the command  
603 options “-p 6 --mm --very-sensitive --no-unal --no-mixed --no-discordant -X2000”. The  
604 resulting data was then processed using `scTE` with the command:

605

```
606 scTE_scatacseq -i $<in> -x hg38.te.atac.idx -g hg38 -p 1 -UMI False -CB True -o <out>
```

607

608 The genome indices were prebuilt using:

609 `wget -c -O mm10.te.txt.gz 'http://hgdownload.soe.ucsc.edu/goldenPath/mm10/database/rmsk.txt.gz'`

610 `zcat mm10.te.txt.gz | grep -E 'LINE|SINE|LTR|Retroposon' | cut -f6-8,11 >mm10.te.bed`

611 `python3 /share/apps/genomics/unstable/scTE/bin/scTEATAC_build -g mm10.te.bed -o mm10.te.atac`

612

613 `wget -c -O hg38.te.txt.gz 'http://hgdownload.soe.ucsc.edu/goldenPath/hg38/database/rmsk.txt.gz'`

614 `zcat hg38.te.txt.gz | grep -E 'LINE|SINE|LTR|Retroposon' | cut -f6-8,11 >hg38.te.bed`

615 `python3 /share/apps/genomics/unstable/scTE/bin/scTEATAC_build -g hg38.te.bed -o hg38.te.atac`

616

## 617 References

618 1 Cordaux, R. & Batzer, M. A. The impact of retrotransposons on human genome evolution. *Nat*  
619 *Rev Genet* **10**, 691-703, doi:10.1038/nrg2640 (2009).

620 2 Hutchins, A. P. & Pei, D. Transposable elements at the center of the crossroads between  
621 embryogenesis, embryonic stem cells, reprogramming, and long non-coding RNAs. *Sci Bull* **60**,  
622 1722-1733, doi:10.1007/s11434-015-0905-x (2015).

623 3 He, J. *et al.* Transposable elements are regulated by context-specific patterns of chromatin  
624 marks in mouse embryonic stem cells. *Nat Commun* **10**, 34, doi:10.1038/s41467-018-08006-y  
625 (2019).

626 4 Lu, X. *et al.* The retrovirus HERVH is a long noncoding RNA required for human embryonic  
627 stem cell identity. *Nat Struct Mol Biol* **21**, 423-425, doi:10.1038/nsmb.2799 (2014).

628 5 Bourque, G. *et al.* Ten things you should know about transposable elements. *Genome Biol* **19**,  
629 199, doi:10.1186/s13059-018-1577-z (2018).

630 6 Goke, J. *et al.* Dynamic transcription of distinct classes of endogenous retroviral elements  
631 marks specific populations of early human embryonic cells. *Cell Stem Cell* **16**, 135-141,  
632 doi:10.1016/j.stem.2015.01.005 (2015).

633 7 Grow, E. J. *et al.* Intrinsic retroviral reactivation in human preimplantation embryos and  
634 pluripotent cells. *Nature* **522**, 221-225, doi:10.1038/nature14308 (2015).

635 8 Percharde, M. *et al.* A LINE1-Nucleolin Partnership Regulates Early Development and ESC  
636 Identity. *Cell* **174**, 391-405.e319, doi:10.1016/j.cell.2018.05.043 (2018).

637 9 Jachowicz, J. W. *et al.* LINE-1 activation after fertilization regulates global chromatin  
638 accessibility in the early mouse embryo. *Nat Genet* **49**, 1502-1510, doi:10.1038/ng.3945 (2017).

639 10 Tam, O. H., Ostrow, L. W. & Gale Hammell, M. Diseases of the nERVous system:  
640 retrotransposon activity in neurodegenerative disease. *Mobile DNA* **10**, 32,  
641 doi:10.1186/s13100-019-0176-1 (2019).

642 11 Jang, H. S. *et al.* Transposable elements drive widespread expression of oncogenes in human  
643 cancers. *Nat Genet* **51**, 611-617, doi:10.1038/s41588-019-0373-3 (2019).

- 644 12 Chuong, E. B., Elde, N. C. & Feschotte, C. Regulatory activities of transposable elements: from  
645 conflicts to benefits. *Nat Rev Genet* **18**, 71-86, doi:10.1038/nrg.2016.139 (2017).
- 646 13 Feschotte, C. Transposable elements and the evolution of regulatory networks. *Nat Rev Genet*  
647 **9**, 397-405, doi:10.1038/nrg2337 (2008).
- 648 14 Kunarso, G. *et al.* Transposable elements have rewired the core regulatory network of human  
649 embryonic stem cells. *Nat Genet* **42**, 631-634, doi:10.1038/ng.600 (2010).
- 650 15 Faulkner, G. J. *et al.* The regulated retrotransposon transcriptome of mammalian cells. *Nat*  
651 *Genet* **41**, 563-571, doi:10.1038/ng.368 (2009).
- 652 16 Pijuan-Sala, B. *et al.* A single-cell molecular map of mouse gastrulation and early  
653 organogenesis. *Nature* **566**, 490-495, doi:10.1038/s41586-019-0933-9 (2019).
- 654 17 Li, H. *et al.* Dysfunctional CD8 T Cells Form a Proliferative, Dynamically Regulated  
655 Compartment within Human Melanoma. *Cell* **176**, 775-789 e718,  
656 doi:10.1016/j.cell.2018.11.043 (2019).
- 657 18 Tirosh, I. *et al.* Dissecting the multicellular ecosystem of metastatic melanoma by single-cell  
658 RNA-seq. *Science (New York, N.Y.)* **352**, 189-196, doi:10.1126/science.aad0501 (2016).
- 659 19 Macfarlan, T. S. *et al.* Embryonic stem cell potency fluctuates with endogenous retrovirus  
660 activity. *Nature* **487**, 57-63, doi:10.1038/nature11244 (2012).
- 661 20 Fu, X., Wu, X., Djekidel, M. N. & Zhang, Y. Myc and Dnmt1 impede the pluripotent to totipotent  
662 state transition in embryonic stem cells. *Nat Cell Biol* **21**, 835-844, doi:10.1038/s41556-019-  
663 0343-0 (2019).
- 664 21 Treangen, T. J. & Salzberg, S. L. Repetitive DNA and next-generation sequencing:  
665 computational challenges and solutions. *Nat Rev Genet* **13**, 36-46, doi:10.1038/nrg3117 (2011).
- 666 22 Goerner-Potvin, P. & Bourque, G. Computational tools to unmask transposable elements. *Nat*  
667 *Rev Genet* **19**, 688-704, doi:10.1038/s41576-018-0050-x (2018).
- 668 23 Stuart, T. *et al.* Comprehensive Integration of Single-Cell Data. *Cell* **177**, 1888-1902 e1821,  
669 doi:10.1016/j.cell.2019.05.031 (2019).
- 670 24 Wolf, F. A., Angerer, P. & Theis, F. J. SCANPY: large-scale single-cell gene expression data  
671 analysis. *Genome Biol* **19**, 15, doi:10.1186/s13059-017-1382-0 (2018).
- 672 25 Guo, L. *et al.* Resolving Cell Fate Decisions during Somatic Cell Reprogramming by Single-  
673 Cell RNA-Seq. *Mol Cell* **73**, 815-829 e817, doi:10.1016/j.molcel.2019.01.042 (2019).
- 674 26 Zheng, G. X. *et al.* Massively parallel digital transcriptional profiling of single cells. *Nat Commun*  
675 **8**, 14049, doi:10.1038/ncomms14049 (2017).
- 676 27 Garcia-Perez, J. L., Widmann, T. J. & Adams, I. R. The impact of transposable elements on  
677 mammalian development. *Development* **143**, 4101-4114, doi:10.1242/dev.132639 (2016).
- 678 28 Rodriguez-Terrones, D. & Torres-Padilla, M. E. Nimble and Ready to Mingle: Transposon  
679 Outbursts of Early Development. *Trends in genetics : TIG* **34**, 806-820,  
680 doi:10.1016/j.tig.2018.06.006 (2018).
- 681 29 Zhao, T. *et al.* Single-Cell RNA-Seq Reveals Dynamic Early Embryonic-like Programs during  
682 Chemical Reprogramming. *Cell Stem Cell* **23**, 31-45 e37, doi:10.1016/j.stem.2018.05.025  
683 (2018).

- 684 30 Wang, J. *et al.* Primate-specific endogenous retrovirus-driven transcription defines naive-like  
685 stem cells. *Nature* **516**, 405-409, doi:10.1038/nature13804 (2014).
- 686 31 Fort, A. *et al.* Deep transcriptome profiling of mammalian stem cells supports a regulatory role  
687 for retrotransposons in pluripotency maintenance. *Nat Genet* **46**, 558-566, doi:10.1038/ng.2965  
688 (2014).
- 689 32 Theunissen, T. W. *et al.* Molecular Criteria for Defining the Naive Human Pluripotent State. *Cell*  
690 *Stem Cell* **19**, 502-515, doi:10.1016/j.stem.2016.06.011 (2016).
- 691 33 Friedman, C. E. *et al.* Single-Cell Transcriptomic Analysis of Cardiac Differentiation from  
692 Human PSCs Reveals HOPX-Dependent Cardiomyocyte Maturation. *Cell Stem Cell* **23**, 586-  
693 598 e588, doi:10.1016/j.stem.2018.09.009 (2018).
- 694 34 Liu, Q. *et al.* Genome-Wide Temporal Profiling of Transcriptome and Open Chromatin of Early  
695 Cardiomyocyte Differentiation Derived From hiPSCs and hESCs. *Circ Res* **121**, 376-391,  
696 doi:10.1161/CIRCRESAHA.116.310456 (2017).
- 697 35 Abed, M. *et al.* The Gag protein PEG10 binds to RNA and regulates trophoblast stem cell  
698 lineage specification. *PLoS One* **14**, e0214110, doi:10.1371/journal.pone.0214110 (2019).
- 699 36 Zhong, Y. *et al.* Isolation of primitive mouse extraembryonic endoderm (pXEN) stem cell lines.  
700 *Stem Cell Res* **30**, 100-112, doi:10.1016/j.scr.2018.05.008 (2018).
- 701 37 Factor, D. C. *et al.* Epigenomic comparison reveals activation of "seed" enhancers during  
702 transition from naive to primed pluripotency. *Cell Stem Cell* **14**, 854-863,  
703 doi:10.1016/j.stem.2014.05.005 (2014).
- 704 38 Morey, L. *et al.* Polycomb Regulates Mesoderm Cell Fate-Specification in Embryonic Stem  
705 Cells through Activation and Repression Mechanisms. *Cell Stem Cell* **17**, 300-315,  
706 doi:10.1016/j.stem.2015.08.009 (2015).
- 707 39 Merkin, J., Russell, C., Chen, P. & Burge, C. B. Evolutionary dynamics of gene and isoform  
708 regulation in Mammalian tissues. *Science (New York, N.Y.)* **338**, 1593-1599,  
709 doi:10.1126/science.1228186 (2012).
- 710 40 de Soysa, T. Y. *et al.* Single-cell analysis of cardiogenesis reveals basis for organ-level  
711 developmental defects. *Nature* **572**, 120-124, doi:10.1038/s41586-019-1414-x (2019).
- 712 41 Richardson, S. R., Morell, S. & Faulkner, G. J. L1 retrotransposons and somatic mosaicism in  
713 the brain. *Annu Rev Genet* **48**, 1-27, doi:10.1146/annurev-genet-120213-092412 (2014).
- 714 42 Tabula Muris, C. *et al.* Single-cell transcriptomics of 20 mouse organs creates a Tabula Muris.  
715 *Nature* **562**, 367-372, doi:10.1038/s41586-018-0590-4 (2018).
- 716 43 Chuong, E. B., Elde, N. C. & Feschotte, C. Regulatory evolution of innate immunity through co-  
717 option of endogenous retroviruses. *Science (New York, N.Y.)* **351**, 1083-1087,  
718 doi:10.1126/science.aad5497 (2016).
- 719 44 Koonin, E. V. & Krupovic, M. Evolution of adaptive immunity from transposable elements  
720 combined with innate immune systems. *Nat Rev Genet* **16**, 184-192, doi:10.1038/nrg3859  
721 (2015).
- 722 45 Erwin, J. A., Marchetto, M. C. & Gage, F. H. Mobile DNA elements in the generation of diversity  
723 and complexity in the brain. *Nat Rev Neurosci* **15**, 497-506, doi:10.1038/nrn3730 (2014).

- 724 46 Takahashi, K. & Yamanaka, S. Induction of pluripotent stem cells from mouse embryonic and  
725 adult fibroblast cultures by defined factors. *Cell* **126**, 663-676, doi:10.1016/j.cell.2006.07.024  
726 (2006).
- 727 47 Wang, B. *et al.* Induction of Pluripotent Stem Cells from Mouse Embryonic Fibroblasts by Jdp2-  
728 Jhdm1b-Mkk6-Glis1-Nanog-Essrb-Sall4. *Cell Rep* **27**, 3473-3485 e3475,  
729 doi:10.1016/j.celrep.2019.05.068 (2019).
- 730 48 Hou, P. *et al.* Pluripotent stem cells induced from mouse somatic cells by small-molecule  
731 compounds. *Science (New York, N.Y.)* **341**, 651-654, doi:10.1126/science.1239278 (2013).
- 732 49 Cao, S. *et al.* Chromatin Accessibility Dynamics during Chemical Induction of Pluripotency. *Cell*  
733 *Stem Cell* **22**, 529-542 e525, doi:10.1016/j.stem.2018.03.005 (2018).
- 734 50 Schiebinger, G. *et al.* Optimal-Transport Analysis of Single-Cell Gene Expression Identifies  
735 Developmental Trajectories in Reprogramming. *Cell* **176**, 928-943 e922,  
736 doi:10.1016/j.cell.2019.01.006 (2019).
- 737 51 Friedli, M. *et al.* Loss of transcriptional control over endogenous retroelements during  
738 reprogramming to pluripotency. *Genome Res* **24**, 1251-1259, doi:10.1101/gr.172809.114  
739 (2014).
- 740 52 Liu, J. *et al.* The oncogene c-Jun impedes somatic cell reprogramming. *Nat Cell Biol* **17**, 856-  
741 867, doi:10.1038/ncb3193 (2015).
- 742 53 Chronis, C. *et al.* Cooperative Binding of Transcription Factors Orchestrates Reprogramming.  
743 *Cell* **168**, 442-459 e420, doi:10.1016/j.cell.2016.12.016 (2017).
- 744 54 Buenrostro, J. D. *et al.* Single-cell chromatin accessibility reveals principles of regulatory  
745 variation. *Nature* **523**, 486-490, doi:10.1038/nature14590 (2015).
- 746 55 Shema, E., Bernstein, B. E. & Buenrostro, J. D. Single-cell and single-molecule epigenomics  
747 to uncover genome regulation at unprecedented resolution. *Nat Genet* **51**, 19-25,  
748 doi:10.1038/s41588-018-0290-x (2019).
- 749 56 Cusanovich, D. A. *et al.* A Single-Cell Atlas of In Vivo Mammalian Chromatin Accessibility. *Cell*  
750 **174**, 1309-1324 e1318, doi:10.1016/j.cell.2018.06.052 (2018).
- 751 57 Sun, X. *et al.* Transcription factor profiling reveals molecular choreography and key regulators  
752 of human retrotransposon expression. *Proc Natl Acad Sci U S A* **115**, E5526-E5535,  
753 doi:10.1073/pnas.1722565115 (2018).
- 754 58 Chen, X., Miragaia, R. J., Natarajan, K. N. & Teichmann, S. A. A rapid and robust method for  
755 single cell chromatin accessibility profiling. *Nat Commun* **9**, 5345, doi:10.1038/s41467-018-  
756 07771-0 (2018).
- 757 59 Warren, J. S. *et al.* Histone methyltransferase Smyd1 regulates mitochondrial energetics in the  
758 heart. *Proc Natl Acad Sci U S A* **115**, E7871-E7880, doi:10.1073/pnas.1800680115 (2018).
- 759 60 Rasmussen, T. L. *et al.* Smyd1 facilitates heart development by antagonizing oxidative and ER  
760 stress responses. *PLoS One* **10**, e0121765, doi:10.1371/journal.pone.0121765 (2015).
- 761 61 Franklin, S. *et al.* The chromatin-binding protein Smyd1 restricts adult mammalian heart growth.  
762 *Am J Physiol Heart Circ Physiol* **311**, H1234-H1247, doi:10.1152/ajpheart.00235.2016 (2016).
- 763 62 Calderon, D. *et al.* Landscape of stimulation-responsive chromatin across diverse human  
764 immune cells. *Nat Genet*, doi:10.1038/s41588-019-0505-9 (2019).

- 765 63 Bravo Gonzalez-Blas, C. *et al.* cisTopic: cis-regulatory topic modeling on single-cell ATAC-seq  
766 data. *Nat Methods* **16**, 397-400, doi:10.1038/s41592-019-0367-1 (2019).
- 767 64 Li, W. *et al.* Activation of transposable elements during aging and neuronal decline in  
768 *Drosophila*. *Nat Neurosci* **16**, 529-531, doi:10.1038/nn.3368 (2013).
- 769 65 Keren-Shaul, H. *et al.* A Unique Microglia Type Associated with Restricting Development of  
770 Alzheimer's Disease. *Cell* **169**, 1276-1290 e1217, doi:10.1016/j.cell.2017.05.018 (2017).
- 771 66 Lawlor, N. *et al.* Single-cell transcriptomes identify human islet cell signatures and reveal cell-  
772 type-specific expression changes in type 2 diabetes. *Genome Res* **27**, 208-222,  
773 doi:10.1101/gr.212720.116 (2017).
- 774 67 Xin, Y. *et al.* RNA Sequencing of Single Human Islet Cells Reveals Type 2 Diabetes Genes.  
775 *Cell Metab* **24**, 608-615, doi:10.1016/j.cmet.2016.08.018 (2016).
- 776 68 Fadista, J. *et al.* Global genomic and transcriptomic analysis of human pancreatic islets reveals  
777 novel genes influencing glucose metabolism. *Proc Natl Acad Sci U S A* **111**, 13924-13929,  
778 doi:10.1073/pnas.1402665111 (2014).
- 779 69 Darmanis, S. *et al.* Single-Cell RNA-Seq Analysis of Infiltrating Neoplastic Cells at the Migrating  
780 Front of Human Glioblastoma. *Cell Rep* **21**, 1399-1410, doi:10.1016/j.celrep.2017.10.030  
781 (2017).
- 782 70 Chuong, E. B., Rumi, M. A., Soares, M. J. & Baker, J. C. Endogenous retroviruses function as  
783 species-specific enhancer elements in the placenta. *Nat Genet* **45**, 325-329,  
784 doi:10.1038/ng.2553 (2013).
- 785 71 Payer, L. M. & Burns, K. H. Transposable elements in human genetic disease. *Nat Rev Genet*,  
786 doi:10.1038/s41576-019-0165-8 (2019).
- 787 72 Burns, K. H. Transposable elements in cancer. *Nat Rev Cancer* **17**, 415-424,  
788 doi:10.1038/nrc.2017.35 (2017).
- 789 73 De Cecco, M. *et al.* L1 drives IFN in senescent cells and promotes age-associated inflammation.  
790 *Nature* **566**, 73-78, doi:10.1038/s41586-018-0784-9 (2019).
- 791 74 Li, H. *et al.* The Sequence Alignment/Map format and SAMtools. *Bioinformatics* **25**, 2078-2079,  
792 doi:10.1093/bioinformatics/btp352 (2009).
- 793 75 Frankish, A. *et al.* GENCODE reference annotation for the human and mouse genomes.  
794 *Nucleic Acids Res* **47**, D766-D773, doi:10.1093/nar/gky955 (2019).
- 795 76 Jurka, J. Repbase update: a database and an electronic journal of repetitive elements. *Trends*  
796 *in genetics : TIG* **16**, 418-420, doi:10.1016/s0168-9525(00)02093-x (2000).
- 797 77 Dobin, A. *et al.* STAR: ultrafast universal RNA-seq aligner. *Bioinformatics* **29**, 15-21,  
798 doi:10.1093/bioinformatics/bts635 (2013).
- 799 78 Nowotschin, S. *et al.* The emergent landscape of the mouse gut endoderm at single-cell  
800 resolution. *Nature* **569**, 361-367, doi:10.1038/s41586-019-1127-1 (2019).
- 801 79 Lun, A. T., McCarthy, D. J. & Marioni, J. C. A step-by-step workflow for low-level analysis of  
802 single-cell RNA-seq data with Bioconductor. *F1000Res* **5**, 2122,  
803 doi:10.12688/f1000research.9501.2 (2016).
- 804 80 Hutchins, A. P. *et al.* Models of global gene expression define major domains of cell type and  
805 tissue identity. *Nucleic Acids Res* **45**, 2354-2367, doi:10.1093/nar/gkx054 (2017).

- 806 81 Jin, Y., Tam, O. H., Paniagua, E. & Hammell, M. TEtranscripts: a package for including  
807 transposable elements in differential expression analysis of RNA-seq datasets. *Bioinformatics*  
808 **31**, 3593-3599, doi:10.1093/bioinformatics/btv422 (2015).
- 809 82 Risso, D., Schwartz, K., Sherlock, G. & Dudoit, S. GC-content normalization for RNA-Seq data.  
810 *BMC Bioinformatics* **12**, 480, doi:10.1186/1471-2105-12-480 (2011).
- 811 83 Hutchins, A. P., Jauch, R., Dyla, M. & Miranda-Saavedra, D. glbase: a framework for combining,  
812 analyzing and displaying heterogeneous genomic and high-throughput sequencing data. *Cell*  
813 *Regen (Lond)* **3**, 1, doi:10.1186/2045-9769-3-1 (2014).
- 814 84 McLeay, R. C. & Bailey, T. L. Motif Enrichment Analysis: a unified framework and an evaluation  
815 on ChIP data. *BMC Bioinformatics* **11**, 165, doi:10.1186/1471-2105-11-165 (2010).
- 816 85 Li, D. *et al.* Chromatin Accessibility Dynamics during iPSC Reprogramming. *Cell Stem Cell* **21**,  
817 819-833 e816, doi:10.1016/j.stem.2017.10.012 (2017).
- 818 86 Langmead, B. & Salzberg, S. L. Fast gapped-read alignment with Bowtie 2. *Nat Methods* **9**,  
819 357-359, doi:10.1038/nmeth.1923 (2012).

820

## 821 **Acknowledgements**

822 We grateful to Rujin Huang for the helpful discussions and advice. We appreciate the  
823 assistance of Lihui Lin, Huijian Feng and Yuanbang Mai on the data analysis. We  
824 thank the GuangZhou Branch of the Supercomputing Center of Chinese Academy of  
825 Science for its support. We thank the support from the Center for Computational  
826 Science and Engineering of Southern University of Science and Technology. This  
827 work was supported by the National Natural Science Foundation of China (31970589,  
828 31801217, 31850410463, 31850410486), Guangdong Science and Technology  
829 Commission (2019A050510004), and the Shenzhen Peacock plan (201701090668B).

830

## 831 **Author contributions**

832 J.H., A.P.H., and J.C. initiated the project and wrote the manuscript. J.H. and A.P.H.  
833 performed the bioinformatic analysis with the assistance of all other authors. A.P.H.  
834 and J.C. supervised and funded the project.

835



836 **Competing interests:**

837 The authors declare no competing interests

**Fig. 1**

bioRxiv preprint doi: <https://doi.org/10.1101/2020.07.23.218800>; this version posted July 24, 2020. The copyright holder for this preprint (which was not certified by peer review) is the author/funder, who has granted bioRxiv a license to display the preprint in perpetuity. It is made available under a [CC-BY-NC-ND 4.0 International license](https://creativecommons.org/licenses/by-nc-nd/4.0/).

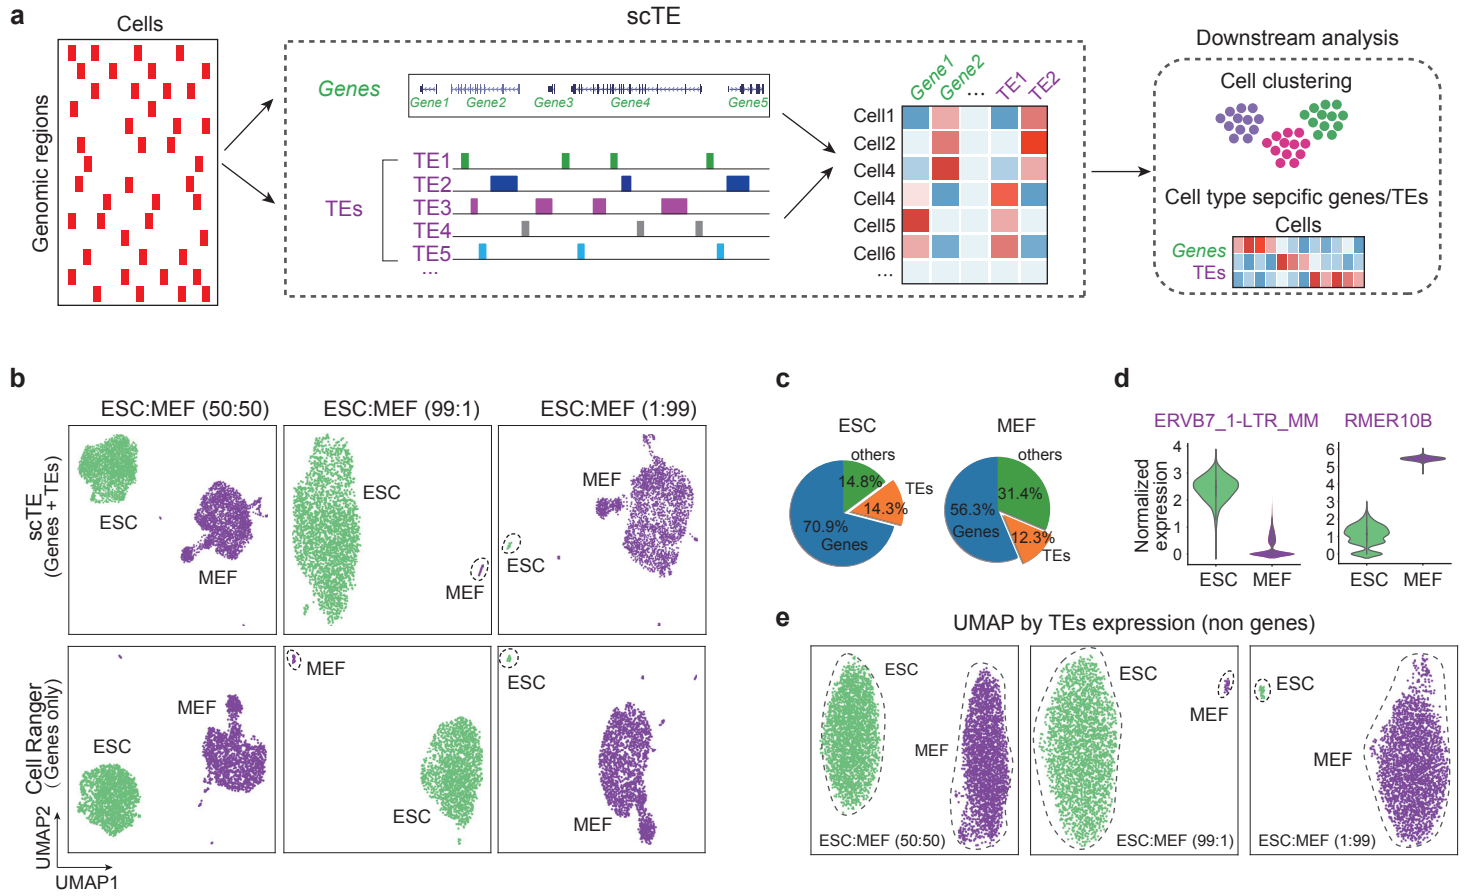

**Fig. 1 | scTE workflow and applications.** (a) Schematic of the workings of scTE. For scRNA-seq data the reads are mapped to the genome, and assigned to either a gene, or a metagene model of a TE. Multimapping read data will assign the best mapping read to a type of TE. Reads are always mapped to a gene first, and then a TE if no gene is found. The resulting assignments are then collapsed into a matrix of read counts for each cell, versus each gene/TE. This matrix can be used in downstream applications. (b) UMAP plot showing mixtures of MEFs and ESCs in the indicated ratios. The top panels show scTE analysis, the lower panels show Cell Ranger analysis results. Cells are colored by their sample of origin. (c) Percentage of reads mapping to genes, TEs or other regions of the genome in MEFs and ESCs. (d) Violin plot showing the expression of selected TEs in MEFs and ESCs. (e) As in panel b, but only TE expression was used.

**Fig. 2**

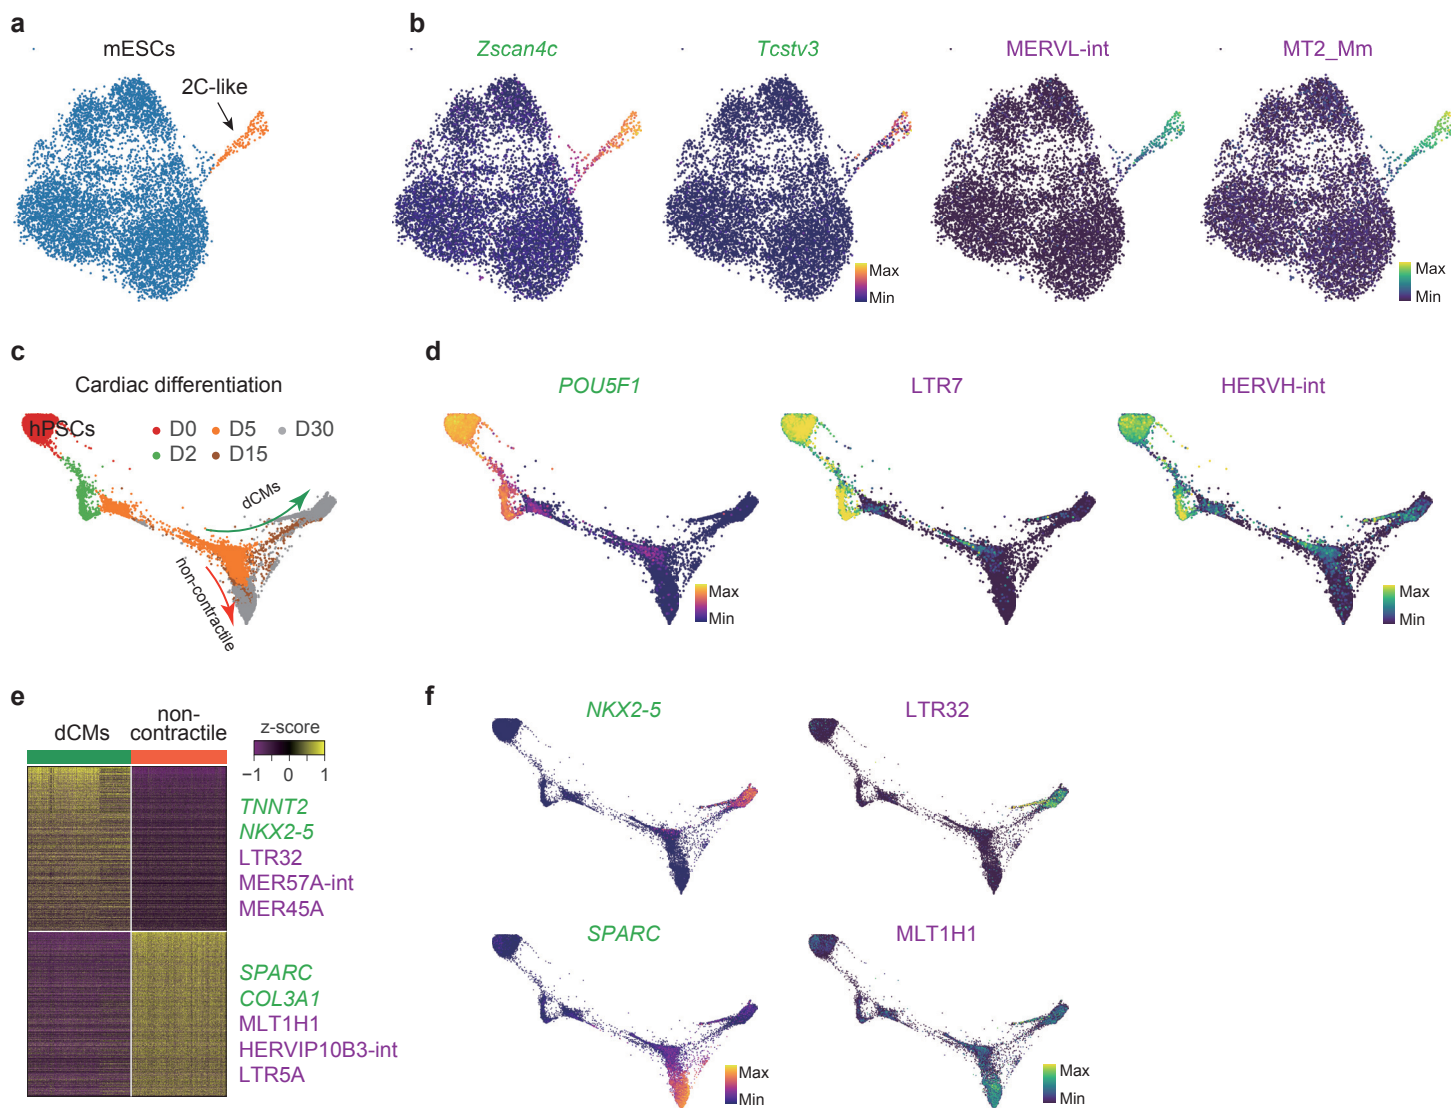

**Fig. 2 | Dynamic transcription of TEs in ESCs and during cardiac differentiation.** (a) UMAP plot of mouse ESCs. Cells are colored by cell type cluster. (b) Same as panel a, but cells are colored based on the expression of the indicated genes and TEs. *Zscan4c* and *Tcstv3* are marker genes for the 2C-like cells. (c) Trajectory reconstruction of single cells through a cardiac differentiation timecourse showing the definitive cardiomyocytes (dCMs) branch and non-contractile branch. Days of differentiation (D) are labelled. (d) As in panel c, but cells are colored by the expression of the indicated genes and TEs. (e) Heatmap of expression differences between dCM (contractile) branch and non-contractile branch cells, selected differentially expressed genes and TEs are labelled. (f) As in panel d, but cells are colored by the expression level of the indicated genes and TEs.

**Fig. 3**

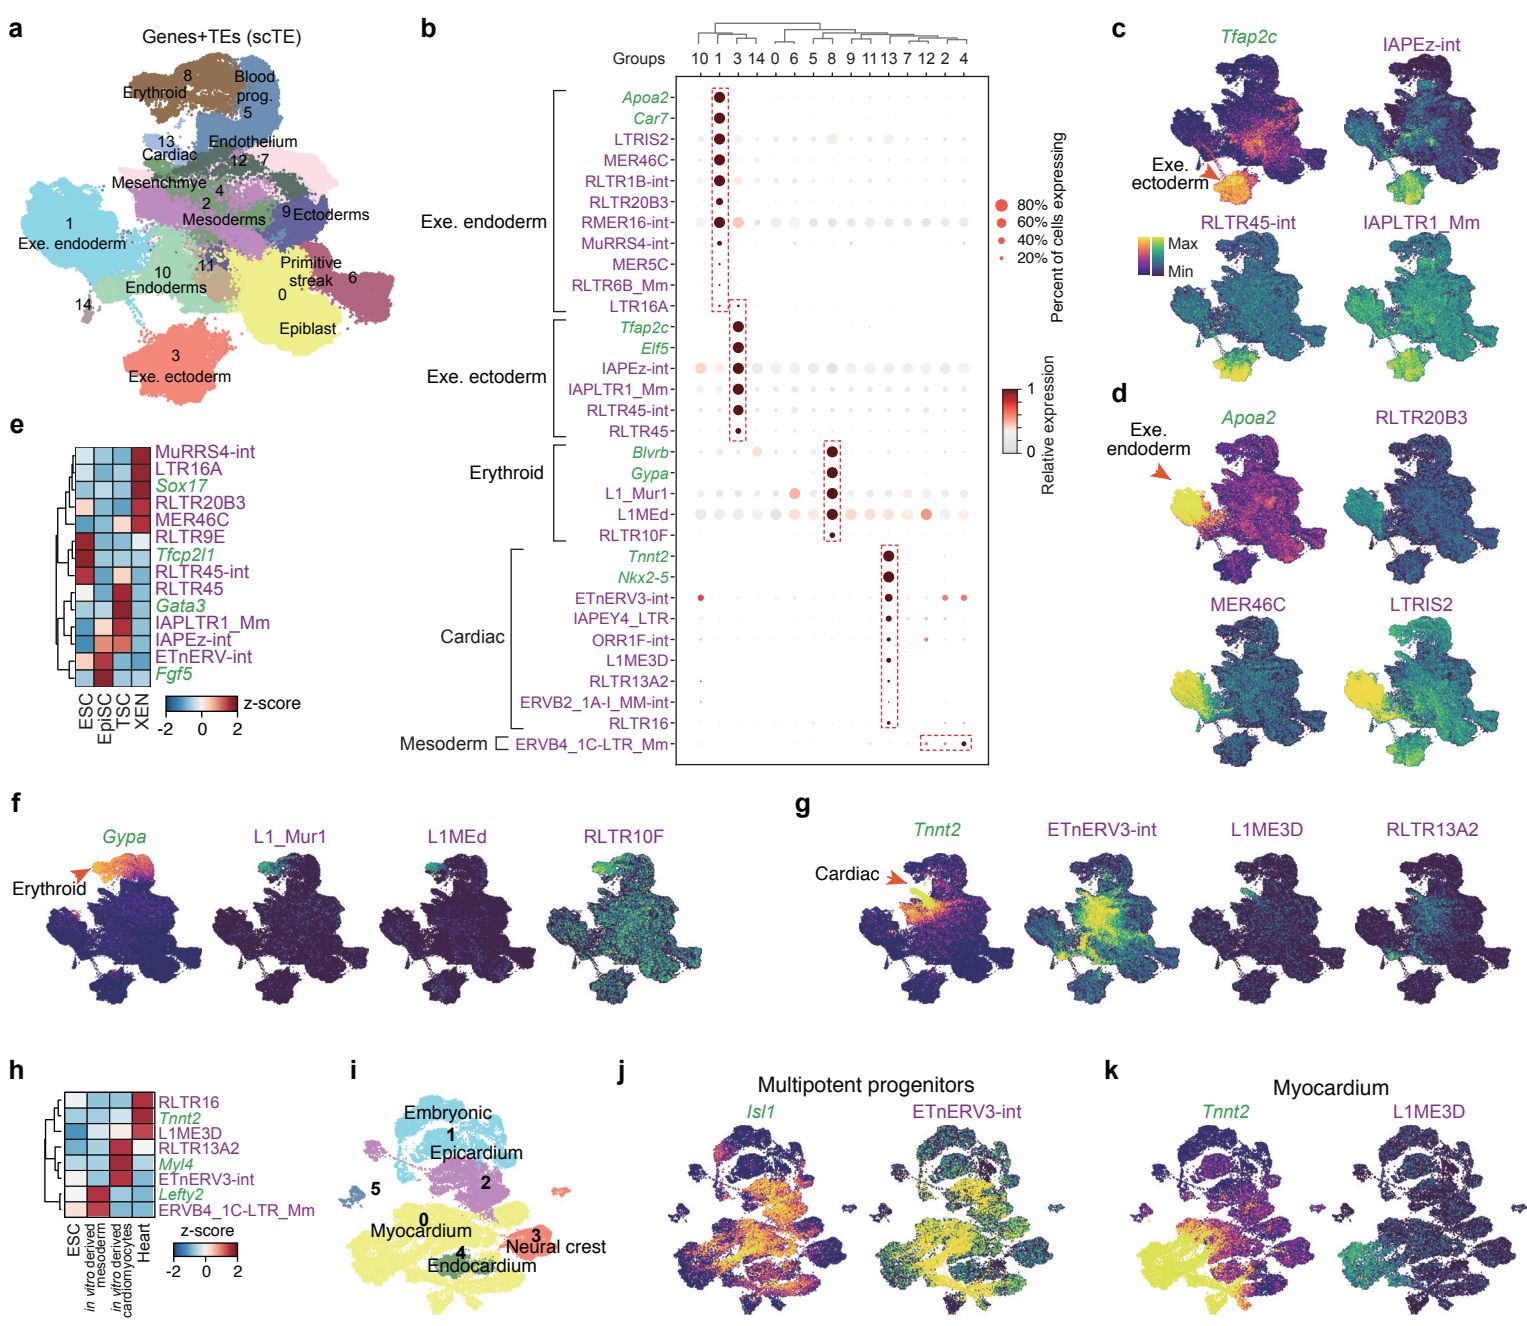

**Fig. 3 | Widespread cell type-specific expression of TEs during gastrulation.** (a) UMAP plots of the mouse gastrulation data using both genes and TEs. Selected lineages are labelled (Leiden, resolution=0.3). (b) Dot plot showing a selection of marker genes and TEs for the indicated cell lineages. (c) Expression of the indicated extra embryonic ectoderm gene *Tfap2c* and selected TEs. (d) Expression of the extra embryonic endoderm marker gene *Apoa2* and selected TEs. (e) Expression of the indicated TEs and marker genes in bulk RNA-seq data from ESCs, EpiSCs, XEN (extra embryonic endoderm cells) and TSCs (trophoblast stem cells). *Tfcp2l1*, *Fgf5*, *Gata3* and *Sox17* serve as markers for ESCs, EpiSCs, TSCs, and XEN cells, respectively. Data is displayed as a z-score using the variance from all genes. (f) Expression of the erythroid marker gene *Gypa*, and selected TEs. (g) Expression of the cardiac marker gene *Tnnt2* and selected TEs. (h) Expression of the indicated TEs and marker genes from bulk RNA-seq data. (i) UMAP plot of the embryonic mouse heart scRNA-seq data using both TEs and genes. The indicated developmental stages are labelled as in the original study. (j-k) UMAP as panel i, but cells are colored by the expression of indicated genes/TEs.

**Fig. 4**

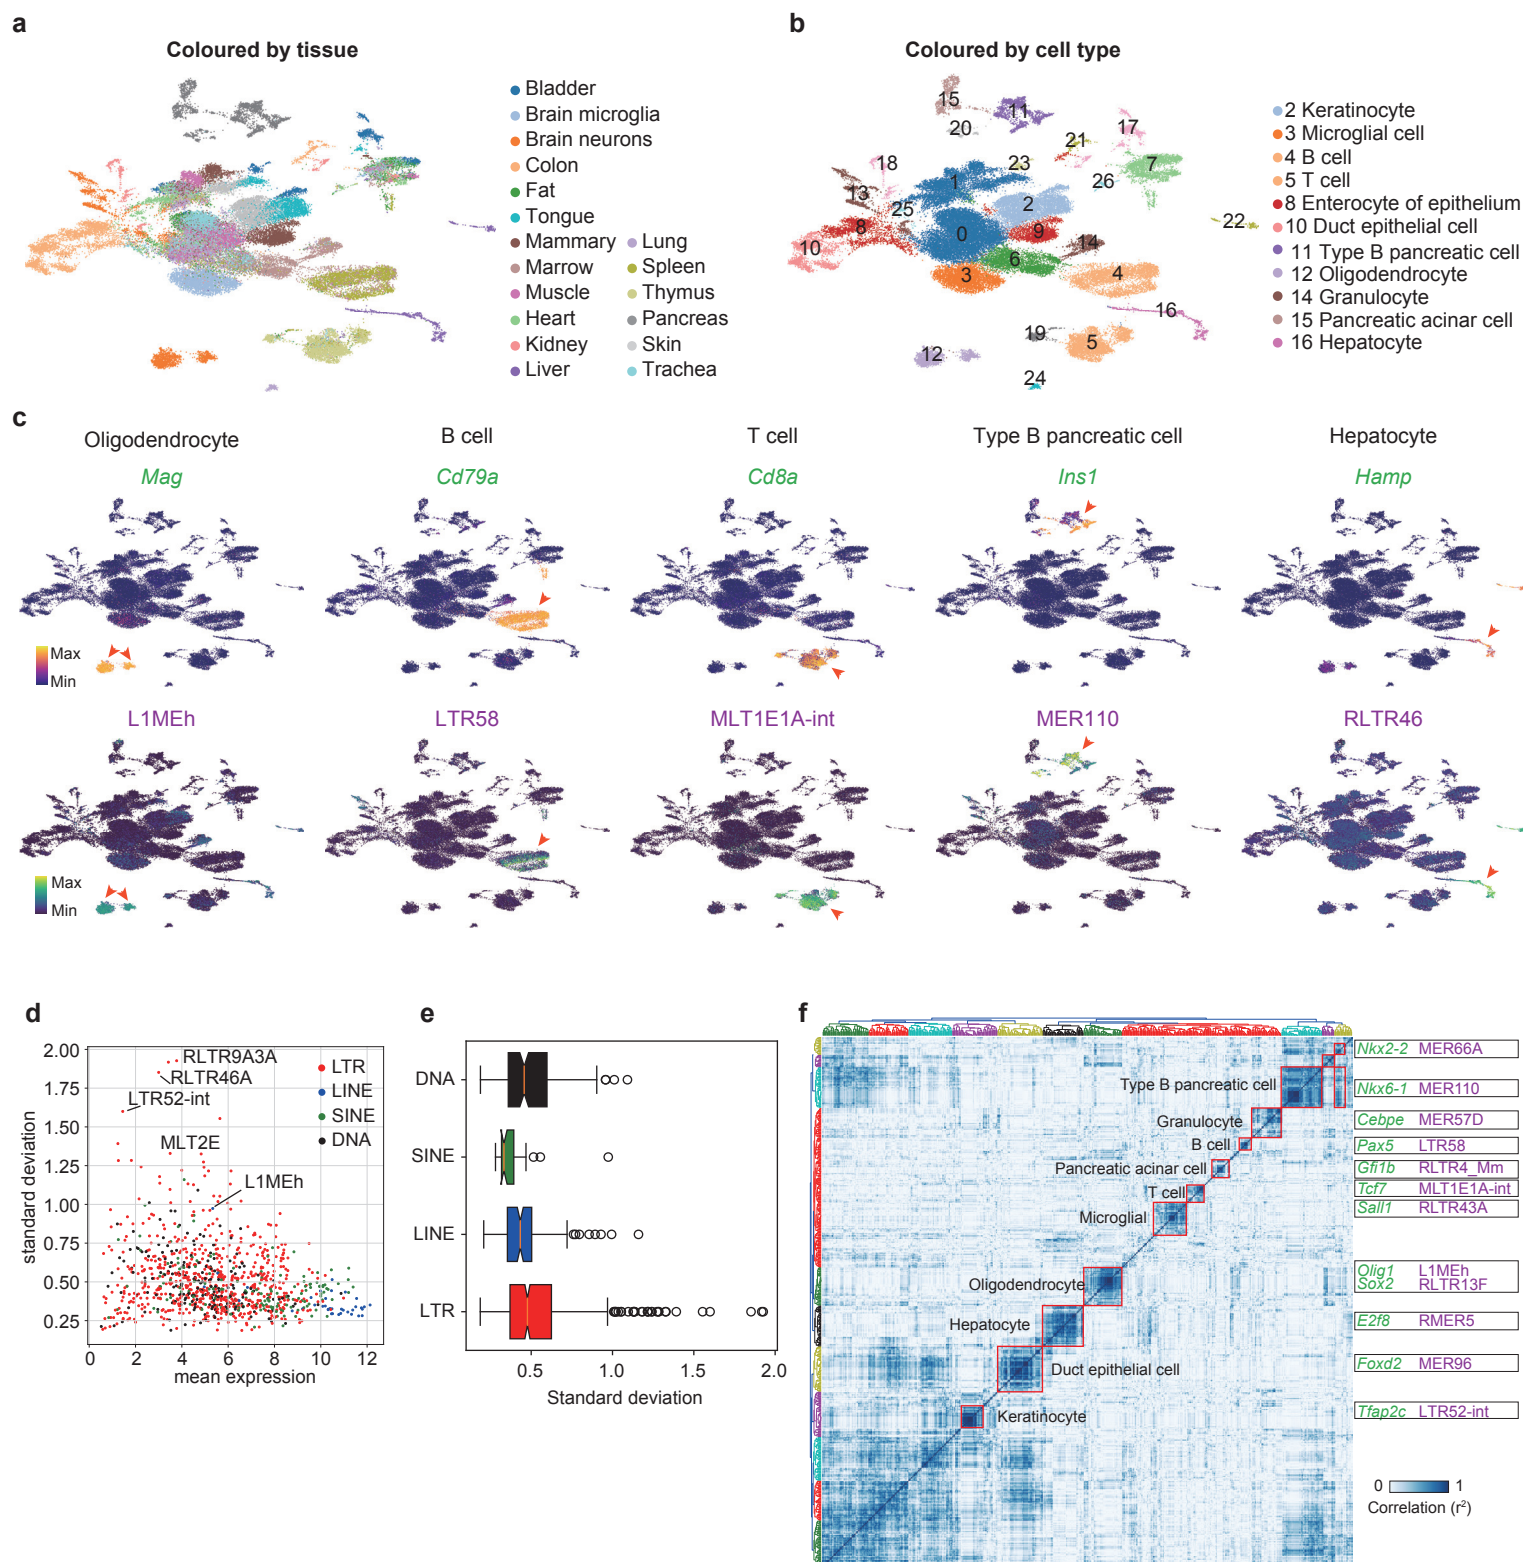



**Fig. 4 | Class-specific expression of TEs in somatic cells.** (a) UMAP plots of the Tabula Muris data, using both genes and TEs as analyzed with scTE. The tissue sources for the cells is indicated. (b) UMAP plot as in panel a, but clustered into groups (Leiden, resolution=0.5). (c) Same as panel b, but cells are colored by the expression of indicated genes/TEs. (d) Scatter plot showing TE expression heterogeneity. The x-axis is the mean expression for cells from panel b, the y-axis is the standard deviation for each TE type, the higher standard deviation represents higher heterogeneity across cell types. (e) Boxplot for the standard deviations for each class of TEs. (f) Correlation heatmap showing the co-expression of TFs and TEs.

**Fig. 5**

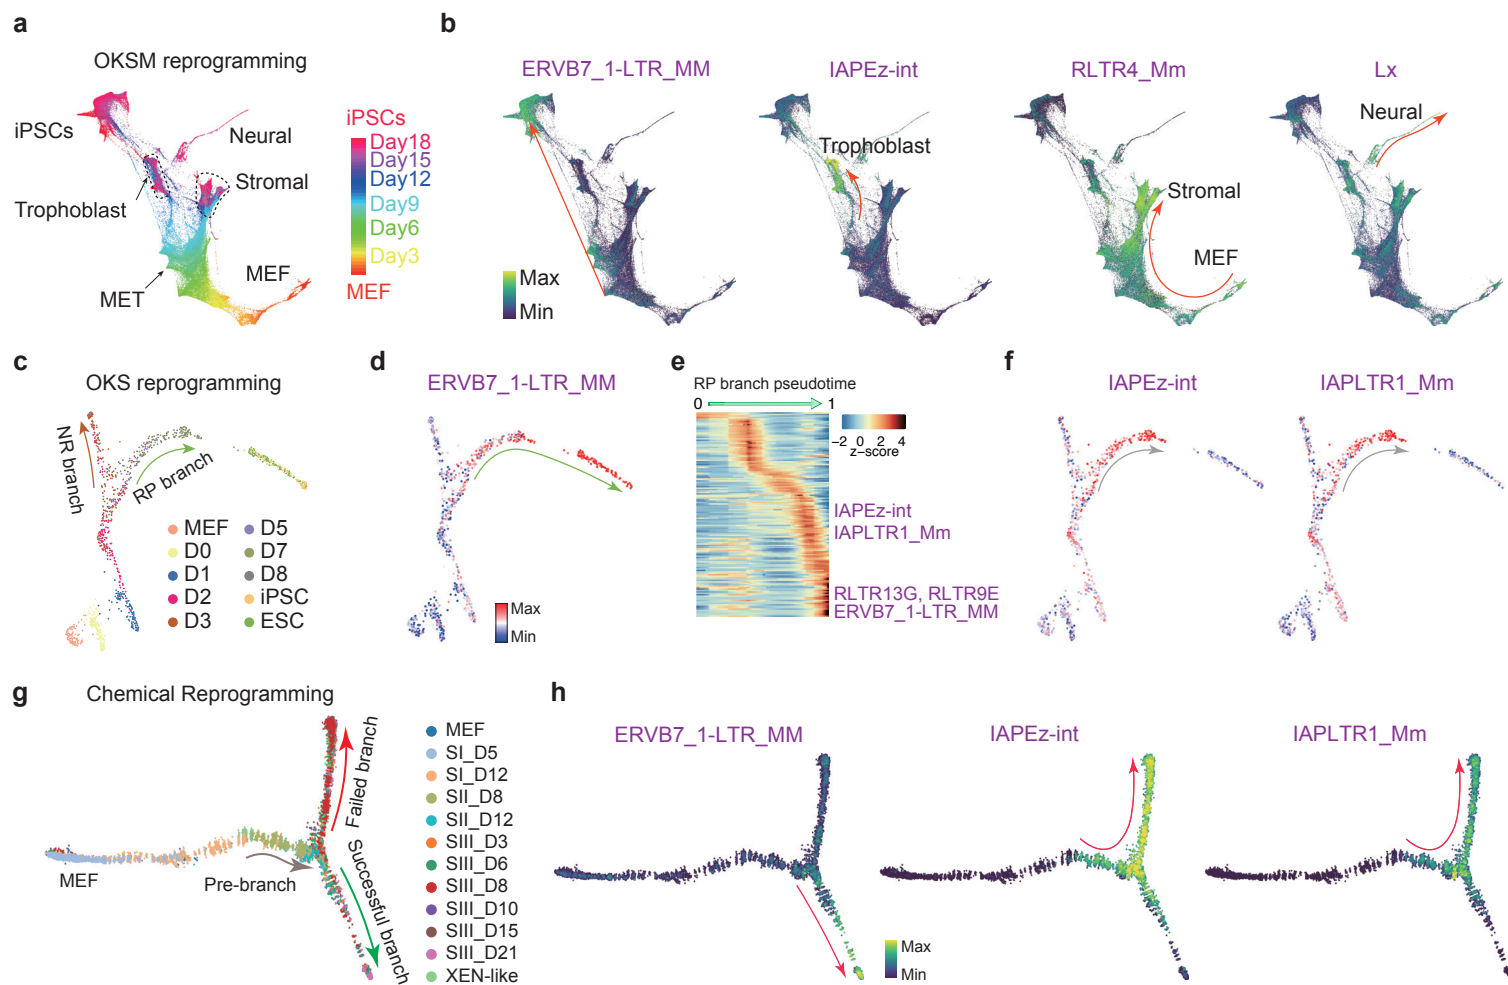

**Fig. 5 | Stage-specific expression of TEs in somatic cell reprogramming.** (a) Trajectory reconstruction during OKSM reprogramming, cells are colored by time point. (b) As in panel a, but cells are colored by the expression of the indicated TEs. (c) Force-directed (FR) layout of cells during OKS reprogramming, cells are colored by time point. (d) Same with panel c, but cells are colored by the expression change of the ERVB7\_1-LTR\_MM TE during reprogramming. (e) Expression heatmap of the top 145 dynamically expressed TEs in a pseudotime ordering for the RP branch, selected TEs are indicated. (f) Expression changes of the indicated TEs during reprogramming. (g) Trajectory reconstruction during chemical reprogramming, cells are colored by time point. (h) As in panel g, but showing TE expression specific to the successful or failed branches of reprogramming.



**Fig. 6 | Analysis of the Chromatin State of TEs in Single-Cell ATAC-seq data.** (a) Schematic plot of scTE for scATAC-seq data analysis. The reads are mapped to the genome, and assigned to a metagene TE, and then the cells were clustered based on the TE matrix. (b) UMAP plot of the TE chromatin state from scATAC-seq data for a selection of FACS-purified mouse cell types. (c) Heatmap of the top 50 cell type-specific opened TEs in the indicated cell types, selected example TEs are indicated. (d) UMAP plot as in panel b, but cells are colored by chromatin-state of the indicated TEs. (e) Genome tracks showing the aggregate scATAC-seq profiles (top panel). Randomly selected 100 single cell profiles are show below the aggregated profiles (bottom panel). With include (unique + multiple) or exclude (unique) multiple mapped reads. (f) UMAP plot of the expression of the myocardium marker gene *Smyd1*, from the cardiogenesis data, see [Fig. 3i](#).

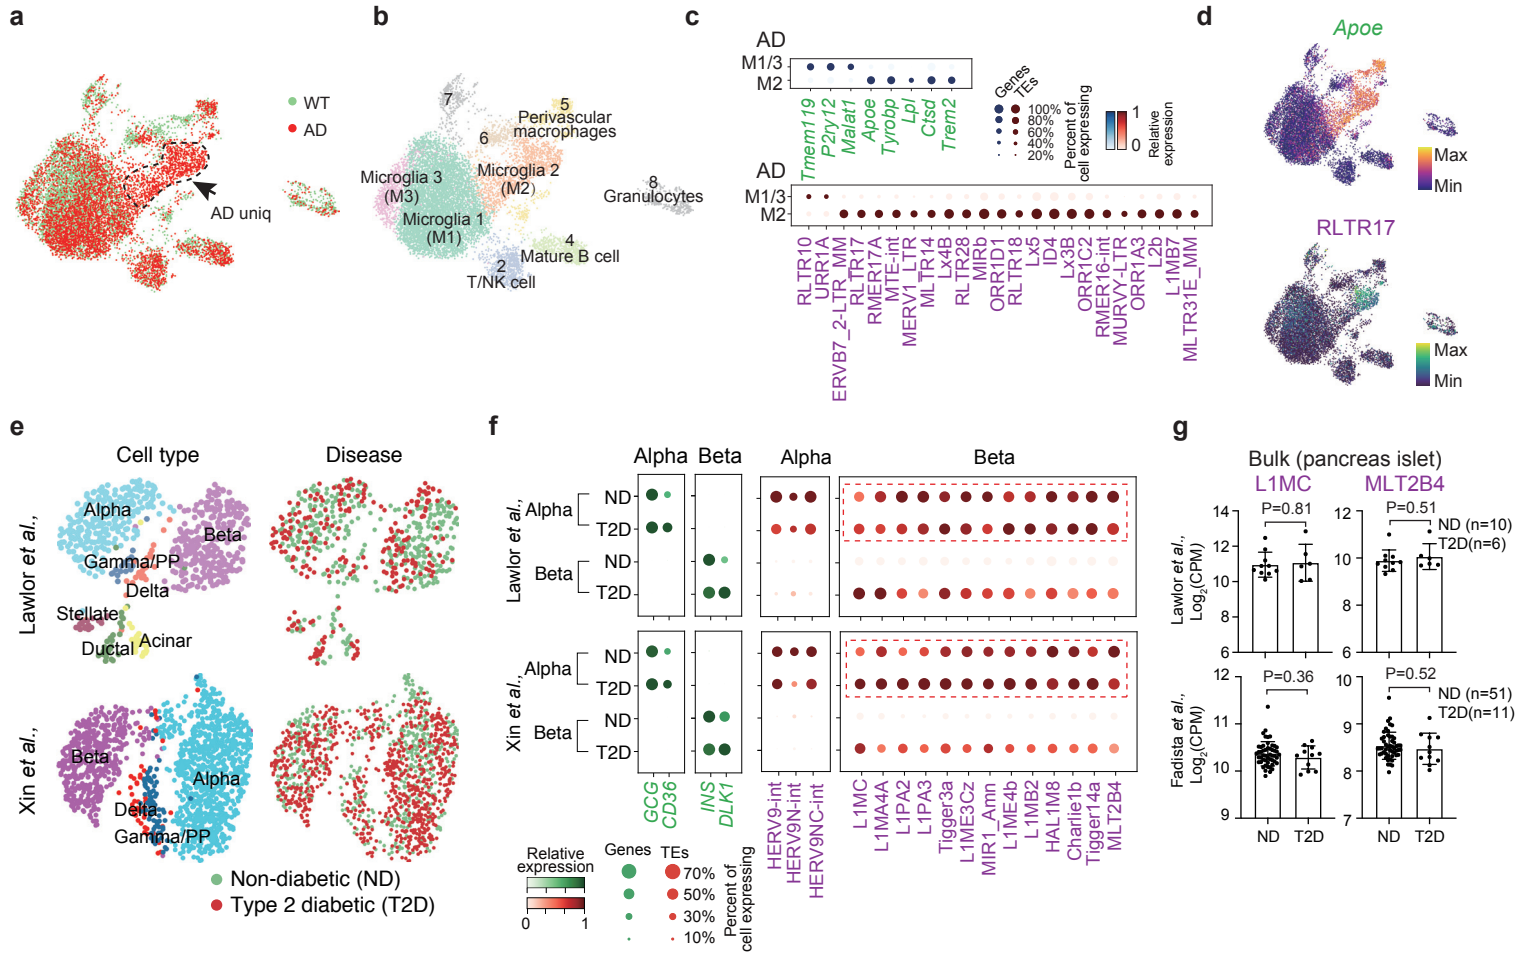

**Fig. 7 | TEs are differentially expressed in single cells in the diseased state.** (a) UMAP plot of the single cells genes and TE expression, cells are colored by WT (wild-type) and AD (Alzheimer's disease) state. (b) UMAP plot, as in panel a, but clustered into groups (Leiden, resolution=0.5). (c) Dot plot showing the differential expressed genes (top) and TEs (bottom) between disease associated microglia (M2) and homeostatic microglia (M1/3) in AD mice. (d) UMAP plot, as in panel a, but cells are colored by the expression of the indicated *Apoa2* or the TE RLTR17. (e) UMAP plots of pancreatic islet cells. Cells are colored by cell types (left) or disease-state (right). Cell types were annotated according to the metadata from the original study, and matched the expression of known marker genes. (f) Dot plot showing marker gene expression (green) or TEs (red) differentially expressed between healthy and T2D alpha and beta cells (Benjamini-Hochberg corrected Wilcoxon rank-sum test,  $P < 0.01$ , and at least >2-fold change between groups). (g) Bar charts showing the expression of the indicated TEs from bulk RNA-seq data. P-value was from an unpaired t-test.
